# Supplementary material for: Scalable synthesis and polymerisation of a β-angelica lactone derived monomer
Source: Royal Society of Chemistry journal article supplement (doi:10.1039/d0gc00338g), 2020-01-01
Supplement: d0gc00338g1.pdf [file d0gc00338g1.pdf]

# Scalable synthesis and polymerisation of an $\alpha$ -angelica lactone derived monomer

Andrea Dell'Acqua,<sup>a,†</sup> Bernhard M. Stadler,<sup>a,†</sup> Sahra Kircheckner,<sup>a</sup> Sergey Tin<sup>a</sup> and Johannes G. de Vries<sup>a,\*</sup>

<sup>a</sup>Leibniz Institut für Katalyse e. V. an der Universität Rostock

Albert-Einstein-Strasse 29a, 18055 Rostock

E-mail: [johannes.devries@catalysis.de](mailto:johannes.devries@catalysis.de)

## Supporting Information

### Table of Contents

|                                                                                                     |    |
|-----------------------------------------------------------------------------------------------------|----|
| Experimental Procedures .....                                                                       | 2  |
| 1. General information .....                                                                        | 2  |
| 2. Preparation of a mixture of angelica lactones with 90 mol-% content of the $\beta$ -isomer ..... | 2  |
| 3. Screening procedure of the DA-reaction with $\beta$ -Angelica lactone and CPD .....              | 3  |
| 4. Semi continuous synthesis of the $\beta$ -Angelica lactone CPD adduct .....                      | 3  |
| 5. Screening of the DA-reaction with other dienes .....                                             | 4  |
| 6. Ring-opening metathesis polymerization (ROMP) of Cp/ $\beta$ AL adduct .....                     | 7  |
| 7. Contact angle measurements .....                                                                 | 12 |
| 8. Experiments at different monomer / initiator ratios .....                                        | 13 |
| 9. Spectral data .....                                                                              | 15 |
| 10. TGA/DSC analysis .....                                                                          | 24 |

## Experimental Procedures

### 1. General information

**Reagents:**  $\alpha$ -angelica lactone (98%, Sigma Aldrich) was used as received, triethylamine (99% Acros) was distilled over KOH and stored under argon atmosphere, aluminium triflate (98%, Sigma Aldrich) and zinc chloride (99%, abcr) were stored under argon in a glove box.

Cyclopentadiene (CPD) was prepared by thermal cracking of dicyclopentadiene (TCI) over iron(0) at 180°C.

**NMR-Spectroscopy:**  $^1\text{H}$ -NMR and  $^{13}\text{C}$ -NMR were recorded at ambient temperature on 300 MHz spectrometers (Avance 300 respectively Fourier 300) or a 400 MHz spectrometer (Avance 400) from Bruker. The chemical shifts  $\delta$  are given in ppm and referenced to the residual proton signal of the deuterated solvent used.

**Gel permeation chromatography (GPC):** Gel permeation chromatograms were recorded with *1260 Infinity GPC/SEC System* from *Agilent Technologies*. The setup consisted of a *SECcurity Isocratic Pump*, *SECcurity 2-Canal-Inline-Degaser*, *SECcurity GPC-Column thermostat TCC6000*, *SECcurity Fraction Collector* and *SECcurity Differential Refractometer detector*. The measurements were performed at a constant temperature of 50 °C using three columns with a polyester co-polymer network as the stationary phase (PSS GRAM 30 Å, 10  $\mu\text{m}$  particle size, 8.0  $\times$  50 mm; PSS GRAM 30 Å, 10  $\mu\text{m}$  particle size, 8.0  $\times$  300 mm; PSS GRAM 1000 Å particle size, 8.0  $\times$  300 mm). THF was applied as the mobile phase with a flow rate of 1 mL $\cdot$ min $^{-1}$ . Polystyrene standards from *ReadyCal* (PSS-pskitr1I-10,  $M_p = 370\text{--}2520000\text{ g}\cdot\text{mol}^{-1}$ ) were used for calibration purposes.

**Differential scanning calorimetry (DSC):** Melting points and glass transition temperatures of polyesters were measured with a *Star-SW DSC* from *Mettler Toledo* using the following temperature program: -90.00 °C isothermal 5.00 min; Ramp 10.00 °C min $^{-1}$  to 200.00 °C; Ramp 10.00 °C/min to -90.00 °C; -90.00 °C isothermal 5.00 min; Ramp 10.00 °C min to 200.00 °C; Ramp 10.00 °C/min to -90.00 °C.

### 2. Preparation of a mixture of angelica lactones with 90 mol-% content of the $\beta$ -isomer

$\alpha$ -angelica lactone (98%, 120 g, 1.2 mol) was added to a 250 ml two neck flask equipped with a condenser and a magnetic stirrer followed by the addition of triethyl amine (5 mol-%, 8.5 ml). The mixture was heated to 100 °C under an argon atmosphere and monitored by  $^1\text{H}$ -NMR. After 1.5 hours a ratio of  $\beta/\alpha$ -angelica lactone of 90-95/10-5 was reached and the condenser exchanged with a distillation head. Subsequent vacuum distillation at 6  $\times 10^{-2}$  mbar yielded two fractions: on at 38-42°C containing mainly the  $\alpha$ -isomer (This fraction was reused for the next

isomerisation reaction.) and another one at 45-50°C contained a mixture of angelica lactones with 90 mol-% content of the  $\beta$ -isomer (106 g, 88% of theory).

$^1\text{H}$  NMR (400 MHz,  $\text{CD}_2\text{Cl}_2$ , signals of  $\beta$ -isomer are reported)  $\delta$  7.46 (dd,  $J = 5.7, 1.5$  Hz, 1H), 6.04 (dd,  $J = 5.7, 2.0$  Hz, 1H), 5.11 (qt,  $J = 6.9, 2.0, 1.5$  Hz, 1H), 1.41 (d,  $J = 6.9$  Hz, 3H).  $^{13}\text{C}$  NMR (101 MHz,  $\text{CD}_2\text{Cl}_2$ )  $\delta$  173.3, 158.0, 121.3, 80.0, 19.0.

### 3. Screening procedure of the DA-reaction with $\beta$ -Angelica lactone and CPD

In a dry and argon purged 10 ml reaction tube the angelica lactone mixture ( $\beta$ -AL=90%, 10 mmol, 900  $\mu\text{l}$ ) and the desired catalyst were mixed. Freshly prepared CPD (3.0-10 eq. 2.5-8.3 ml) was added, the tube was sealed and heated with a microwave oven to the desired reaction temperature where it is kept for the indicated time.

The 2 diastereoisomers of the product were separated by flash column chromatography (heptane/ethyl acetate 8:2), affording the *endo* and *exo* isomers (each of them is a racemic mixture of 2 diastereomers) adduct as colourless oils (*endo*: 949 mg, 5.9 mmol, 30%; *exo*: 119 mg, 0.7 mmol, 7%; *endo/exo* 89/11).

**exo**  $^1\text{H}$  NMR (300 MHz,  $\text{CD}_2\text{Cl}_2$ )  $\delta$  6.21 – 6.04 (m, 2H), 4.17 (qd,  $J = 6.4, 3.2$  Hz, 1H), 3.24 – 3.03 (m, 1H), 2.82 (dtq,  $J = 3.1, 1.5, 0.8$  Hz, 1H), 2.59 (dt,  $J = 8.3, 1.3$  Hz, 1H), 2.08 – 1.97 (m, 1H), 1.50 – 1.35 (m, 7H), 1.30 (d,  $J = 6.4$  Hz, 3H).  $^{13}\text{C}$  NMR (75 MHz,  $\text{CD}_2\text{Cl}_2$ )  $\delta$  177.4, 136.4, 134.9, 78.9, 51.6, 48.5, 48.2, 46.0, 45.6, 22.8.

**endo**  $^1\text{H}$  NMR (300 MHz,  $\text{CD}_2\text{Cl}_2$ )  $\delta$  6.22 – 6.09 (m, 2H), 3.95 (qd,  $J = 6.5, 3.1$  Hz, 1H), 3.26 – 2.97 (m, 3H), 2.67 – 2.54 (m, 1H), 1.57 – 1.46 (m, 1H), 1.39 – 1.29 (m, 1H), 1.25 (d,  $J = 6.5$  Hz, 3H).  $^{13}\text{C}$  NMR (75 MHz,  $\text{CDCl}_3$ )  $\delta$  177.3, 137.6, 137.5, 80.7, 50.0, 48.9, 47.6, 46.3, 43.1, 23.2.

### 4. Semi continuous synthesis of the $\beta$ -Angelica lactone CPD adduct

A 500 mL 2-neck round bottom flask was filled with dicyclopentadiene (100 mL) and iron(0) powder and equipped with a distillation setup. Cyclopentadiene was obtained by thermal cracking of its corresponding dimer at 180 °C and then condensed into a dropping funnel. 2 equivalents (84 mL, 67 g, 1.0 mol) were dropped over 10 hours into a 1 liter 3-necks round bottom flask containing the angelica lactone mixture ( $\beta$ -AL=90%; 50 g, 0.5 mol) and zinc(II) chloride (3.5 g, 0.03 mol, 0.05 eq) while heating up to 70 °C. Once the addition was complete, the reaction was stirred for another 10 hours and monitored by GC. After cooling down to room

temperature, acetone (80-150 ml) was added to precipitate the Lewis acid catalyst. The remaining cyclopentadiene and  $\alpha$ -Angelica lactone was removed by vacuum distillation (50 °C/0.06 mbar) and the remaining cyclopentadiene dimers were precipitated by addition of ice-cold methanol (100 ml) followed by filtration. Solvent removal afforded the product as an orange liquid (69 g, 0.4 mol, 82% yield, *endo:exo* 89/11).

## 5. Screening of the DA-reaction with other dienes

**Microwave-assisted reactions.** In an oven-dried 10 mL reaction tube the angelica lactones mixture ( $\beta$ -AL=90%; 98 mg, 1 mmol), the desired solvent (if used, 2 mL) and catalyst (5 mol%) were added under argon. The diene (10 eq) was added subsequently while stirring the mixture, then the tube was placed in a microwave oven and heated at the desired temperature for the indicated time (Table S1).

**Table S1** Screening of the reaction conditions for the DA-reaction between  $\beta$ -AL and different dienes

| <div style="text-align: center;"> 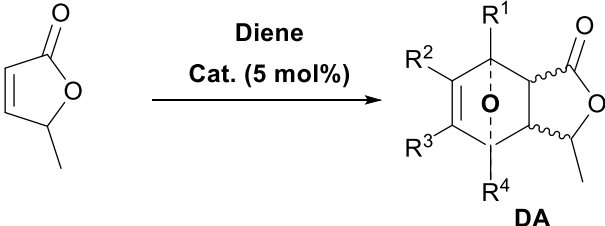 </div> |                      |                                        |         |                     |               |                        |
|-------------------------------------------------------------------------------------------------------------------------------|----------------------|----------------------------------------|---------|---------------------|---------------|------------------------|
| Entry                                                                                                                         | Substrate            | Lewis Acid                             | Solvent | Temperature<br>[°C] | Time<br>[min] | DA <sup>a</sup><br>[%] |
| 1                                                                                                                             | 2,5-DMF <sup>b</sup> | -                                      | -       | 60                  | 30            | 0                      |
| 2                                                                                                                             | 2,5-DMF              | ZnCl <sub>2</sub>                      | -       | 60                  | 30            | 0                      |
| 3                                                                                                                             | 2,5-DMF              | Et <sub>3</sub> Al / AlCl <sub>3</sub> | -       | 90                  | 30            | 0                      |
| 4                                                                                                                             | $\beta$ -Farnesene   | ZnCl <sub>2</sub>                      | -       | 60                  | 30            | 0                      |
| 5                                                                                                                             | $\beta$ -Farnesene   | AlCl <sub>3</sub>                      | -       | 60                  | 30            | 0                      |
| 6                                                                                                                             | $\beta$ -Farnesene   | Et <sub>3</sub> Al / AlCl <sub>3</sub> | -       | 90                  | 30            | 0                      |
| 7                                                                                                                             | $\beta$ -Farnesene   | Et <sub>3</sub> Al / AlCl <sub>3</sub> | Toluene | 110                 | 90            | 0                      |
| 8                                                                                                                             | Myrcene              | ZnCl <sub>2</sub>                      | -       | 60                  | 30            | < 2%                   |
| 9                                                                                                                             | Myrcene              | Et <sub>3</sub> Al / AlCl <sub>3</sub> | -       | 90                  | 30            | < 2%                   |
| 10                                                                                                                            | Myrcene              | Et <sub>3</sub> Al / AlCl <sub>3</sub> | Toluene | 110                 | 90            | 0                      |
| 11                                                                                                                            | Myrcene              | In(OTf) <sub>3</sub>                   | -       | 70                  | 60            | 0                      |
| 12                                                                                                                            | Myrcene              | Sm(OTf) <sub>3</sub>                   | -       | 70                  | 60            | 0                      |

|    |                  |                                        |         |     |    |   |
|----|------------------|----------------------------------------|---------|-----|----|---|
| 13 | Furan            | ZnCl <sub>2</sub>                      | -       | 60  | 30 | 0 |
| 14 | Furan            | Et <sub>3</sub> Al / AlCl <sub>3</sub> | -       | 90  | 30 | 0 |
| 15 | Furan            | Et <sub>3</sub> Al / AlCl <sub>3</sub> | Toluene | 110 | 90 | 0 |
| 16 | Furan            | Yb(OTf) <sub>3</sub>                   | -       | 70  | 30 | 0 |
| 17 | Furan            | Yb(OTf) <sub>3</sub>                   | -       | 130 | 30 | 0 |
| 18 | Furfuryl alcohol | ZnCl <sub>2</sub>                      | -       | 70  | 30 | 0 |
| 19 | Furfuryl alcohol | ZnCl <sub>2</sub>                      | -       | 130 | 30 | 0 |
| 20 | Furfuryl alcohol | AlCl <sub>3</sub>                      | -       | 70  | 30 | 0 |
| 21 | Furfuryl alcohol | AlCl <sub>3</sub>                      | -       | 130 | 30 | 0 |
| 22 | Isoprene         | ZnCl <sub>2</sub>                      | -       | 70  | 30 | 0 |
| 23 | Isoprene         | ZnCl <sub>2</sub>                      | -       | 130 | 30 | 0 |
| 24 | Isoprene         | AlCl <sub>3</sub>                      | -       | 70  | 30 | 0 |
| 25 | Isoprene         | AlCl <sub>3</sub>                      | -       | 130 | 30 | 0 |

<sup>a</sup>GC conversion. <sup>b</sup>2,5-DMF = 2,5-dimethylfuran.

**High temperature reactions.** 4 mL glass vials equipped with magnetic stirring bar and PTFE septum were filled with the angelica lactones mixture ( $\beta$ -AL=90%; 98 mg, 1 mmol) and the diene (10 eq) under argon. The vials were then pierced with needles and placed in a 300 mL stainless steel autoclave, which was pressurised with 20 bar of nitrogen and heated up to 200 °C. The reaction was stirred for 16 hours, then cooled down to room temperature and the reaction mixture was filtered over a short path of silica and directly analysed by GC.

**Isoprene/ $\beta$ AL.**  $\beta$ -Angelica lactone (0.1 mL, 1.0 mmol, 1 eq) and isoprene (2.0 mL, 20 mmol, 20 eq) were added to a stainless steel autoclave and pressurized with 30 bar of nitrogen (to prevent isoprene evaporation). The reaction was stirred at 200 °C for 24 hours. The crude was purified by flash column chromatography (heptane/EtOAc 8:2). The desired product (as mixture of 2 regioisomers, each of them containing 2 diastereoisomers and 2 enantiomers) was obtained as a yellow oil (99.5 mg, 0.6 mmol, 60%).

<sup>1</sup>H NMR (300 MHz, CDCl<sub>3</sub>)  $\delta$  5.45 – 5.32 (m, 1H), 4.25 – 4.15 (m, 1H), 2.85 – 2.67 (m, 1H), 2.37 – 2.04 (m, 4H), 1.91 – 1.70 (m, 1H), 1.62 (dddt, J = 3.8, 2.4, 1.9, 0.9 Hz, 3H), 1.32 (dd, J = 6.4, 3.8 Hz, 3H). <sup>13</sup>C NMR (75 MHz, CDCl<sub>3</sub>)  $\delta$  179.2, 179.1, 132.9, 132.4, 119.1, 118.8, 80.9, 80.9, 39.7, 38.6, 37.3, 36.3, 29.3, 26.9, 25.0, 23.7, 23.4, 22.6, 19.3, 19.2.

MS (EI): m/z calcd. for [C<sub>10</sub>H<sub>14</sub>O<sub>2</sub>]<sup>+</sup>: 166.1; found: 166.

**Myrcene/ $\beta$ AL.**  $\beta$ -Angelica lactone (0.1 mL, 1.0 mmol, 1 eq) and myrcene (1.7 mL, 20 mmol, 20 eq) were added to a SS autoclave and pressurized with 30 bar of nitrogen (to prevent isoprene evaporation). The reaction was stirred at 200 °C for 24 hours. The crude was purified by flash column chromatography (heptane/EtOAc 8:2). The desired product (as mixture of 2 regioisomers, each of them containing 2 diastereoisomers and 2 enantiomers) was obtained as a yellow oil (127 mg, 0.54 mmol, 54%).

MS (EI):  $m/z$  calcd. for  $[C_{15}H_{22}O_2]^+$ : 234.3; found: 234.

**Farnesene/ $\beta$ AL.**  $\beta$ -Angelica lactone (0.1 mL, 1.0 mmol, 1 eq) and  $\beta$ -farnesene (2.4 mL, 20 mmol, 20 eq) were added to a SS autoclave and pressurized with 30 bar of nitrogen (to prevent isoprene evaporation). The reaction was stirred at 200 °C for 24 hours. The crude was purified by flash-column chromatography (heptane/EtOAc 8:2). The desired product (as mixture of 2 regioisomers, each of them containing 2 diastereoisomers and 2 enantiomers) was obtained as a yellow oil (41.3 mg, 0.18 mmol, 18%).

MS (EI):  $m/z$  calcd. for  $[C_{20}H_{30}O_2]^+$ : 302.5; found: 302.

**Table S2** Screening of the reaction conditions for the DA-reaction between  $\beta$ -AL and different dienes

| 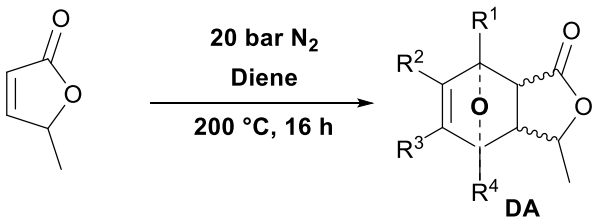 |                    |                                |
|--------------------------------------------------------------------------------------|--------------------|--------------------------------|
| Entry                                                                                | Diene              | Conversion <sup>a</sup><br>[%] |
| 1                                                                                    | 2,5-DMF            | -                              |
| 2                                                                                    | $\beta$ -Farnesene | 64 (18) <sup>b</sup>           |
| 3                                                                                    | Myrcene            | > 99 (54)                      |
| 4                                                                                    | Furane             | -                              |
| 5                                                                                    | Furfuryl alcohol   | -                              |
| 6                                                                                    | Isoprene           | > 99 (60)                      |

<sup>a</sup>GC Conversion. <sup>b</sup>Isolated yields after column chromatography (Heptane/Ethyl acetate 8:2) are reported in brackets.

## 6. Ring-opening metathesis polymerization (ROMP) of Cp/ $\beta$ AL adduct

**Solvent screening.** To a stirred solution of Grubbs II catalyst (4.7 mg, 0.006 mmol, 0.25 mol%) in the desired solvent (Table 3) the Cp/ $\beta$ AL adduct (0.2 mL, 2.2 mmol, 1 eq) was added under argon atmosphere. The reaction was stirred overnight. A few minutes after the addition, all the solutions turned opalescent and a white'ish precipitate appeared, except for the reaction in DCM. The reaction mixtures were then concentrated *in vacuo* and washed several times with methanol (using DCM to re-dissolve the polymer). All the reaction afforded a white'ish, gummy solid. A small portion of each sample was dissolved in a DMF/LiBr solution and analyzed by GPC.

### - MTBE

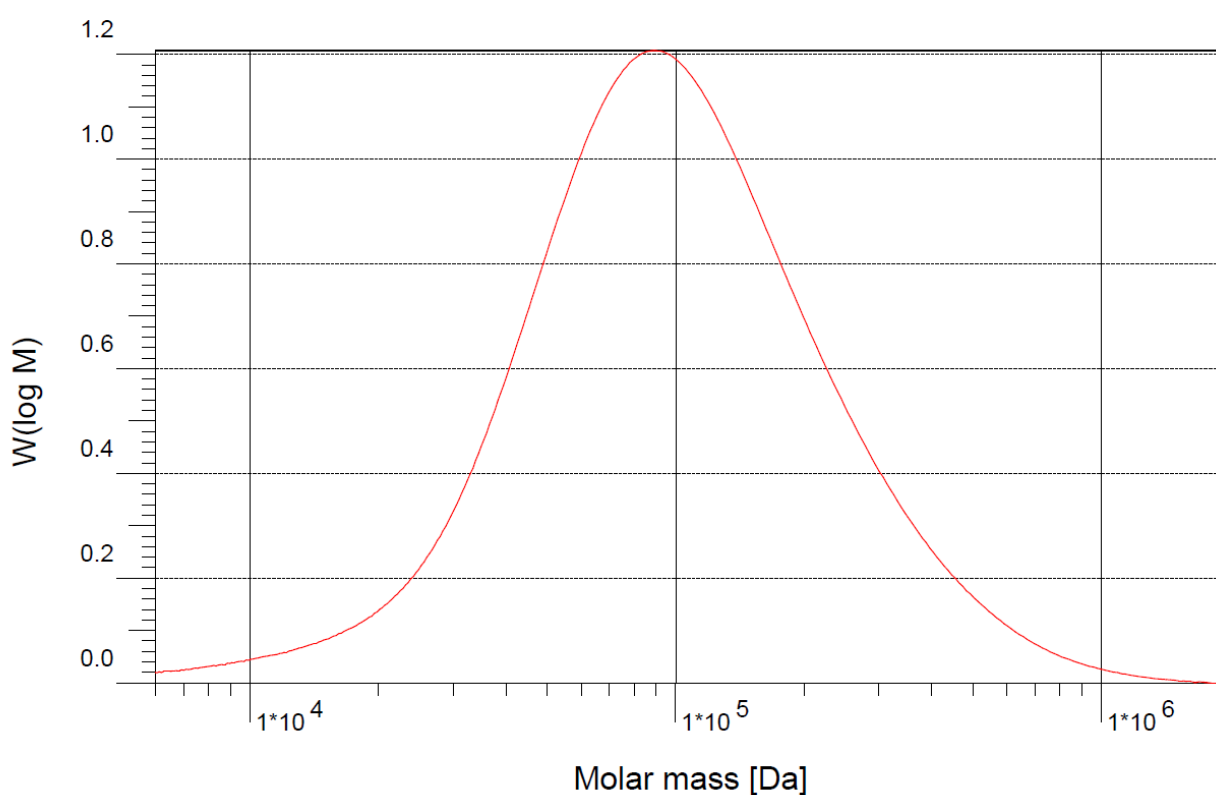

**Figure S1.** GPC chromatogram of *poly*-Cp/ $\beta$ AL; polymerization performed in MTBE.

$$\overline{M}_n = 67.8 \text{ kDa}; \overline{M}_w = 138 \text{ kDa}; D = 2.04$$

### - 2-Methyl-THF

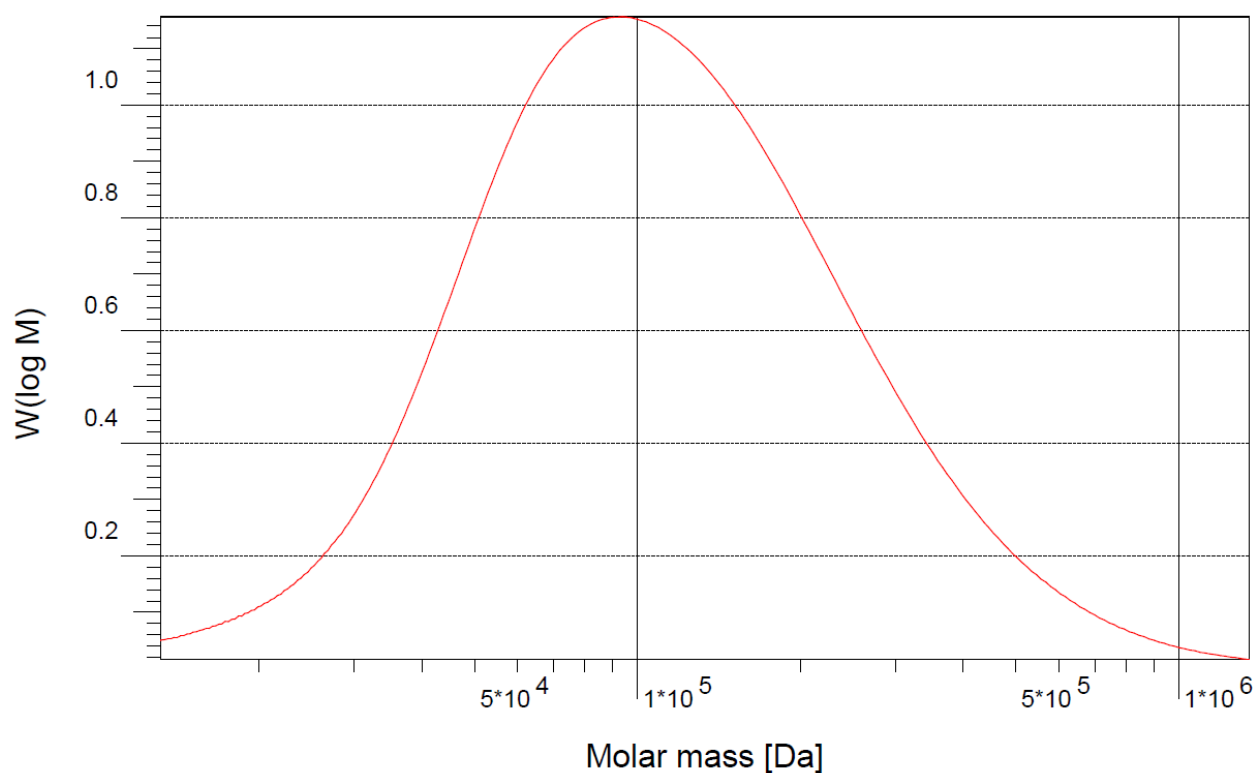

**Figure S2.** GPC chromatogram of *poly-Cp/βAL*; polymerization performed in 2-Me-THF.

$\overline{M}_n = 80.6$  kDa;  $\overline{M}_w = 154$  kDa;  $D = 1.91$

- EtOAc

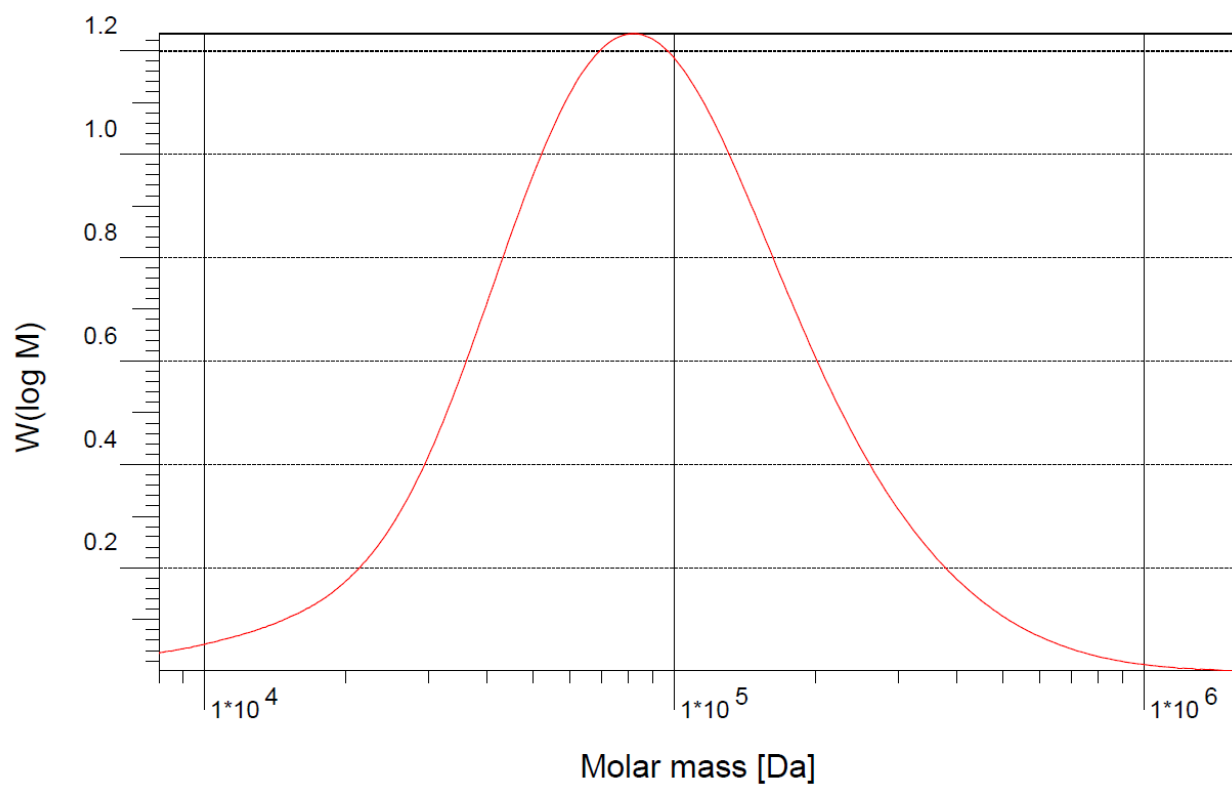

**Figure S3.** GPC chromatogram of *poly-Cp/βAL*; polymerization performed in EtOAc.



$\overline{M}_n = 64.1 \text{ kDa}$ ;  $\overline{M}_w = 118 \text{ kDa}$ ;  $\mathcal{D} = 1.85$

- MIBK

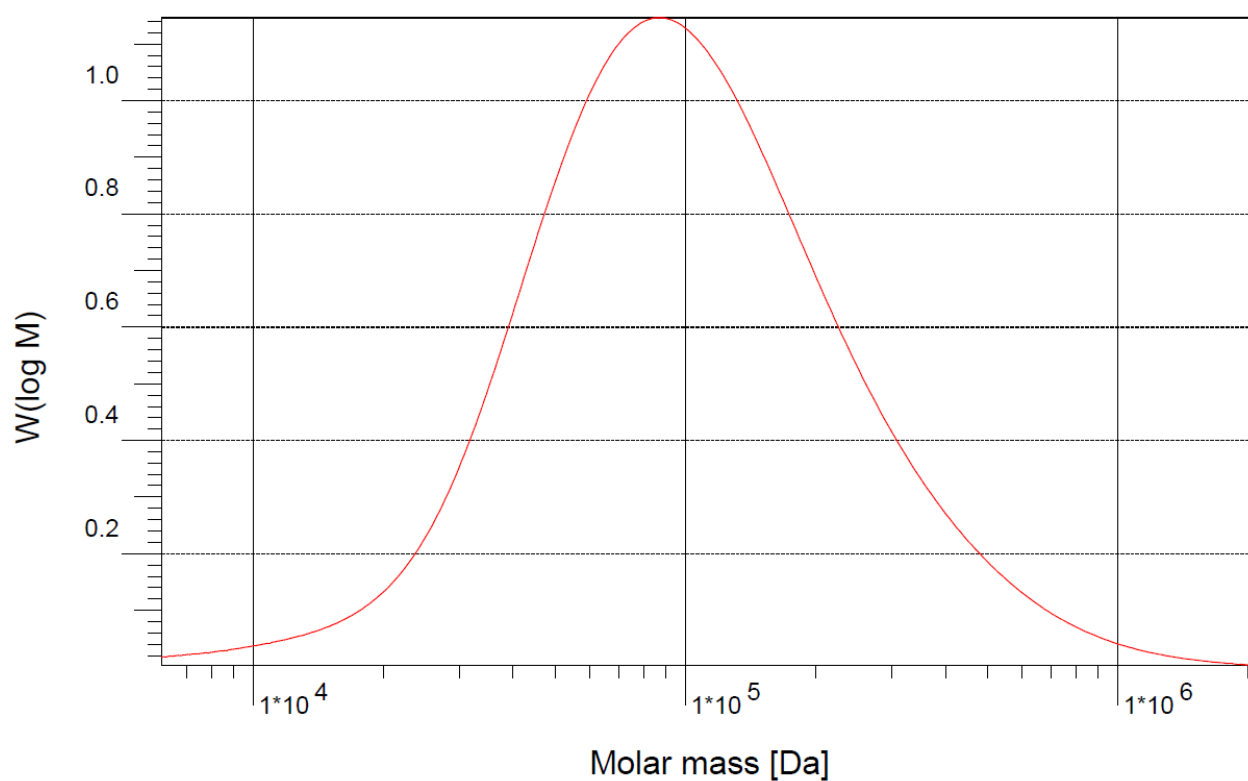

**Figure S4.** GPC chromatogram of *poly-Cp/βAL*; polymerization performed in MIBK.

$\overline{M}_n = 70.9 \text{ kDa}$ ;  $\overline{M}_w = 146 \text{ kDa}$ ;  $\mathcal{D} = 2.06$

- DCM

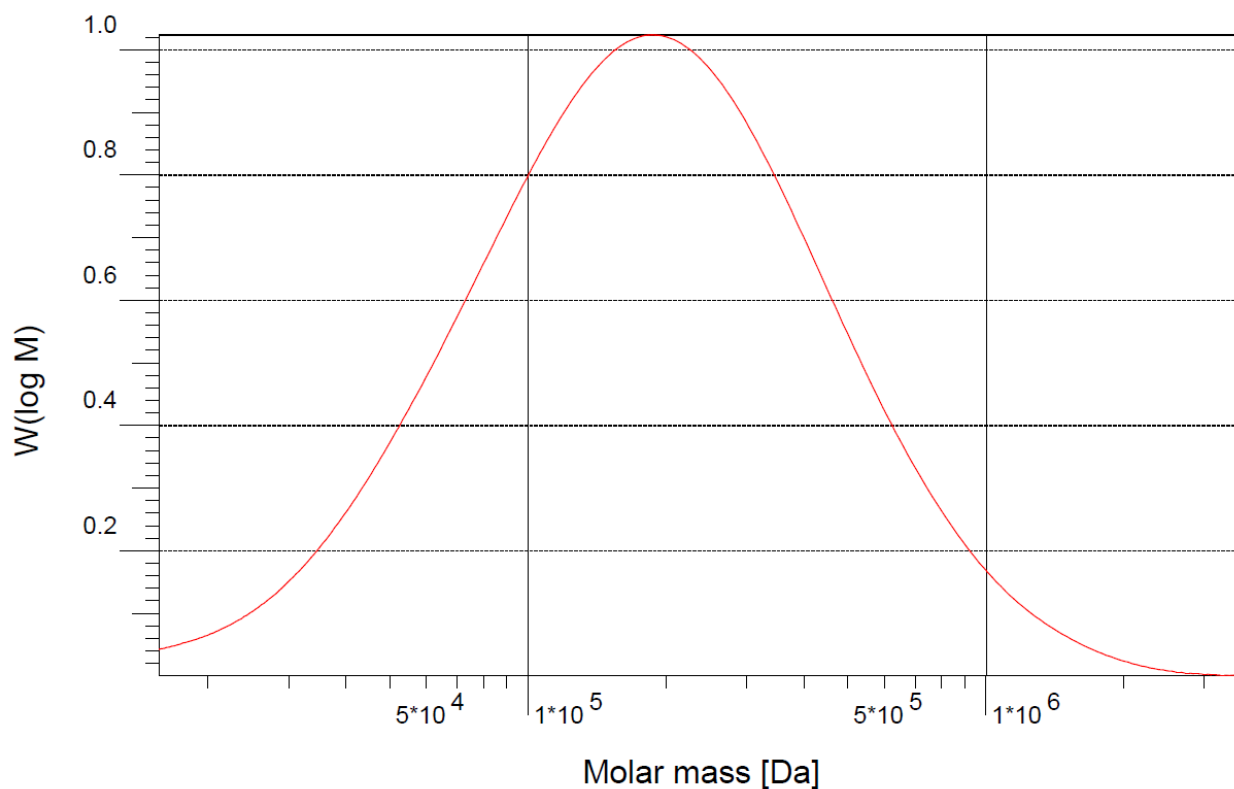

**Figure S5.** GPC chromatogram of *poly-Cp/βAL*; polymerization performed in DCM.

$$\overline{M}_n = 122 \text{ kDa}; \overline{M}_w = 264 \text{ kDa}; D = 2.17$$

**Poly-norbornene.** To a stirred solution of Grubbs II catalyst (4.7 mg, 0.006 mmol, 0.25 mol%) in 2 mL of dichloromethane, norbornene (207 mg, 2.2 mmol, 1 eq) was added under argon atmosphere. The reaction was stirred for 5 hours. The reaction mixtures were then concentrated *in vacuo* and washed several times with methanol (using DCM to re-dissolve the polymer). All the reaction afforded a white'ish, gummy solid. A small portion of each sample was dissolved in a THF and analyzed by GPC.

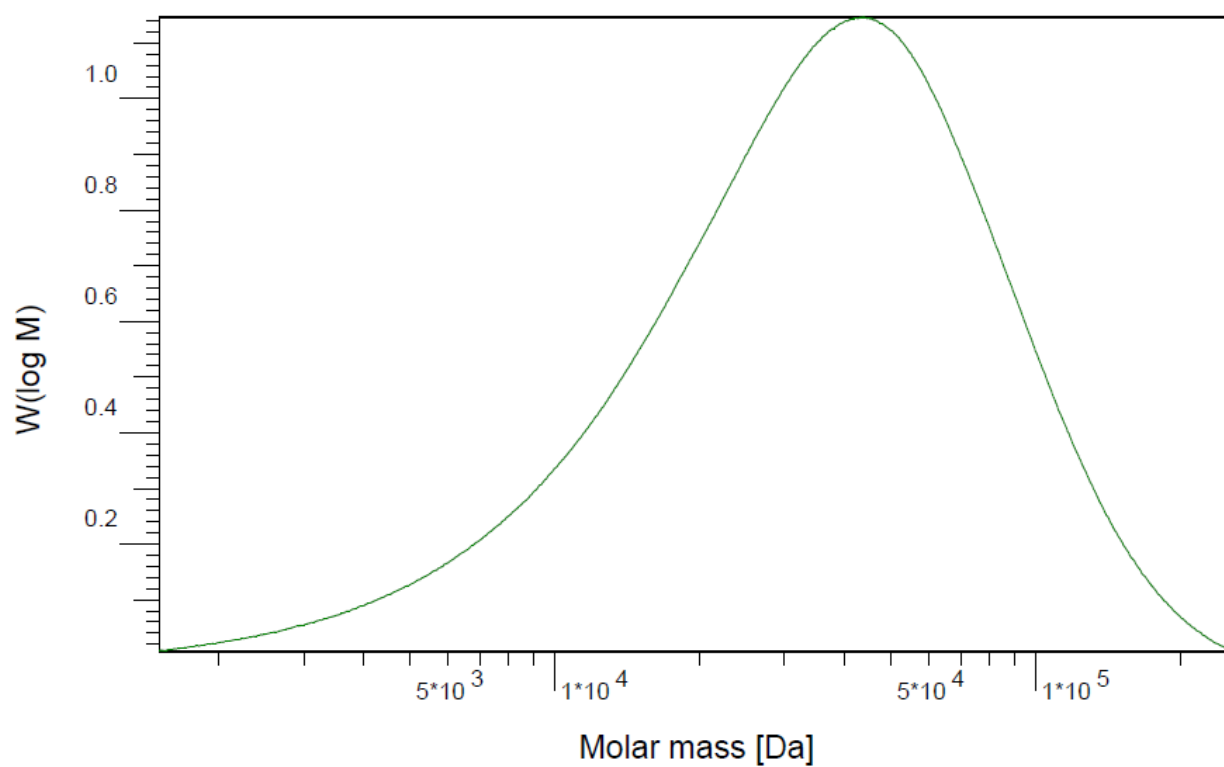

**Figure S6.** GPC chromatogram of *poly-norbornene*.

$\overline{M}_n = 21.8$  kDa;  $\overline{M}_w = 45.9$  kDa;  $D = 2.11$

## 7. Contact angle measurements

A film of the desired polymer (obtained by casting a solution of the polymer in dichloromethane on a Teflon mold and letting the solvent evaporate over 4 hours) was anchored to a stainless-steel flat surface (Figure S7-a). 10  $\mu\text{L}$  of distilled water were dropped on the polymer film using a Hamilton syringe. A picture of the drop was recorded using a DNT DigiMicro Profi digital microscope (Fig 7b. *poly*-norbornene, Fig. 7c. *poly*-Cp/ $\beta$ AL ). Contact angles were determined by measuring the angle using CorrelDraw software. The reported values are the average between 3 different measurements.

a)

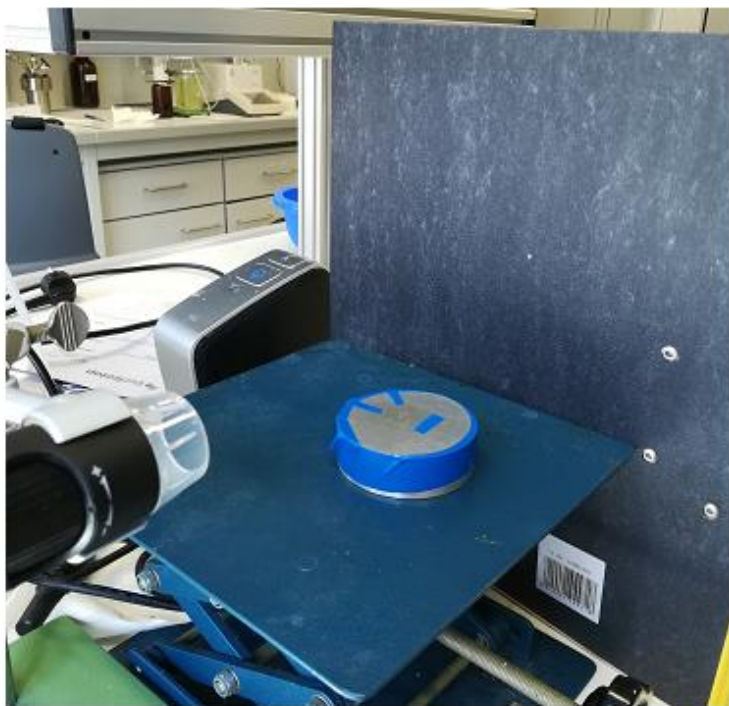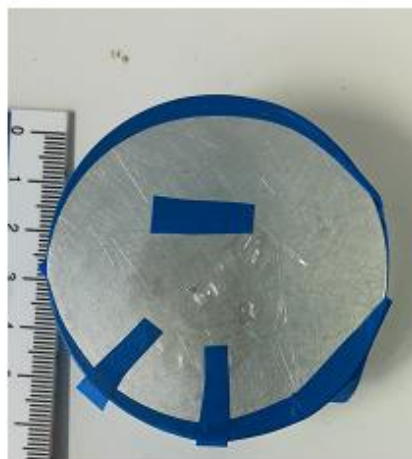

b)

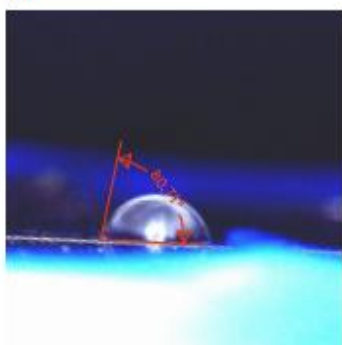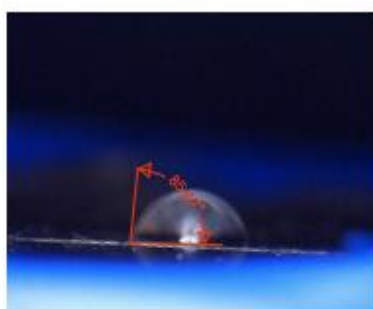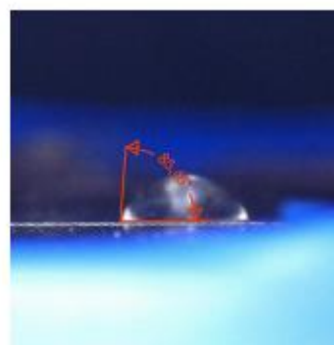

c)

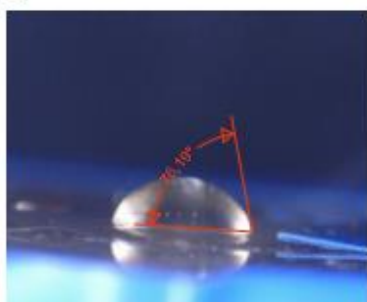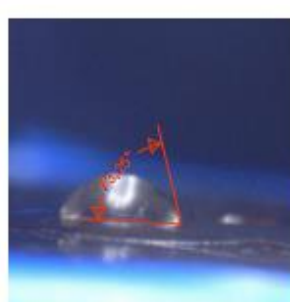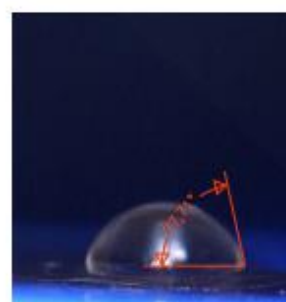

Average contact angle: *poly*-Norbornene:  $\theta = 83.9^\circ$  *poly*-Cp/ $\beta$ AL:  $\theta = 75.7^\circ$

8. Experiments at different monomer / initiator ratios.

100:1

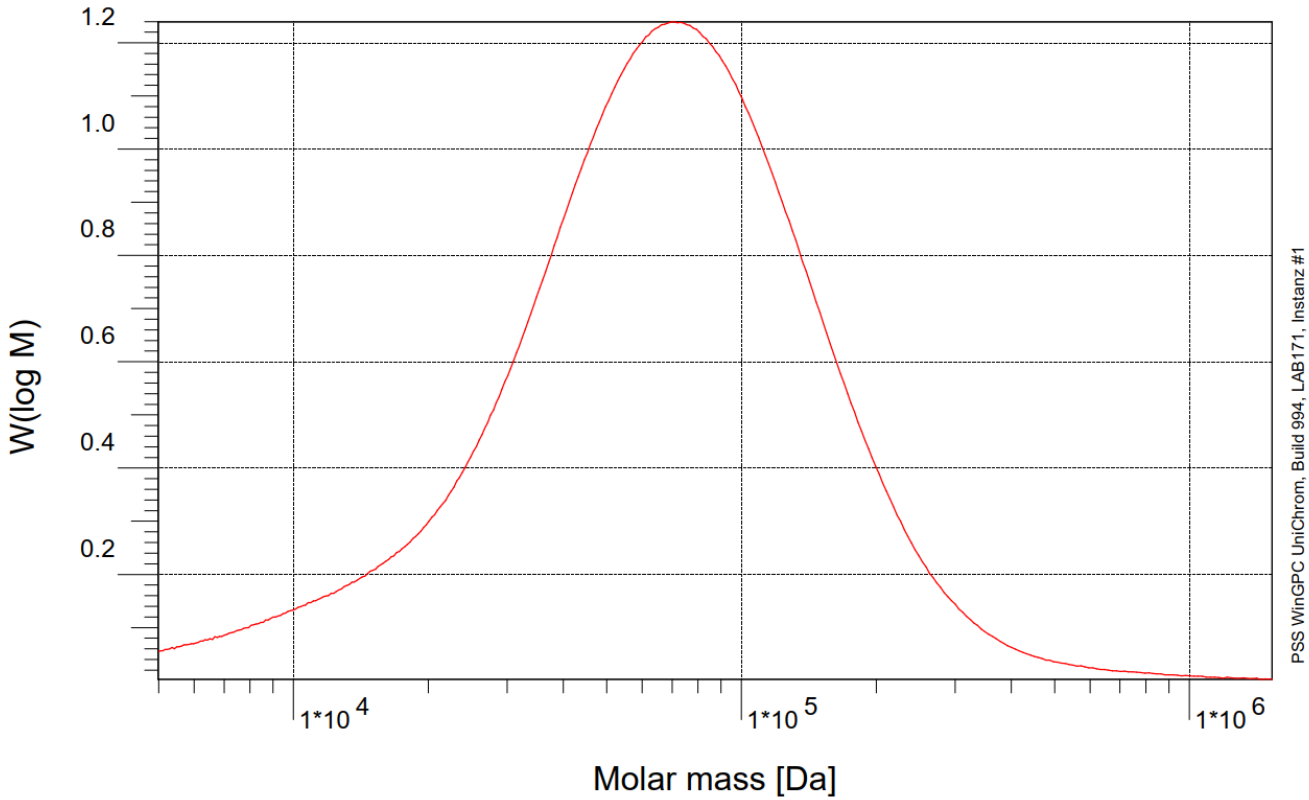

200:1

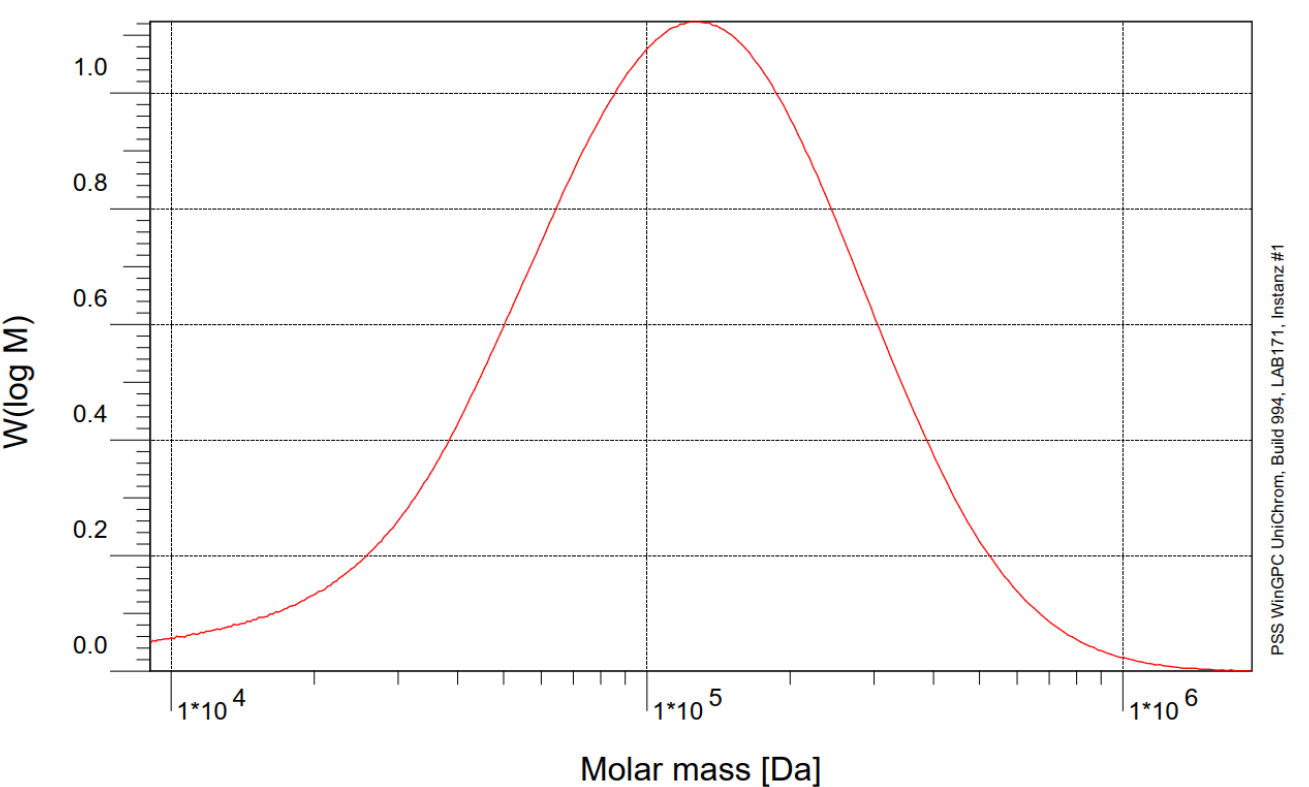

400:1

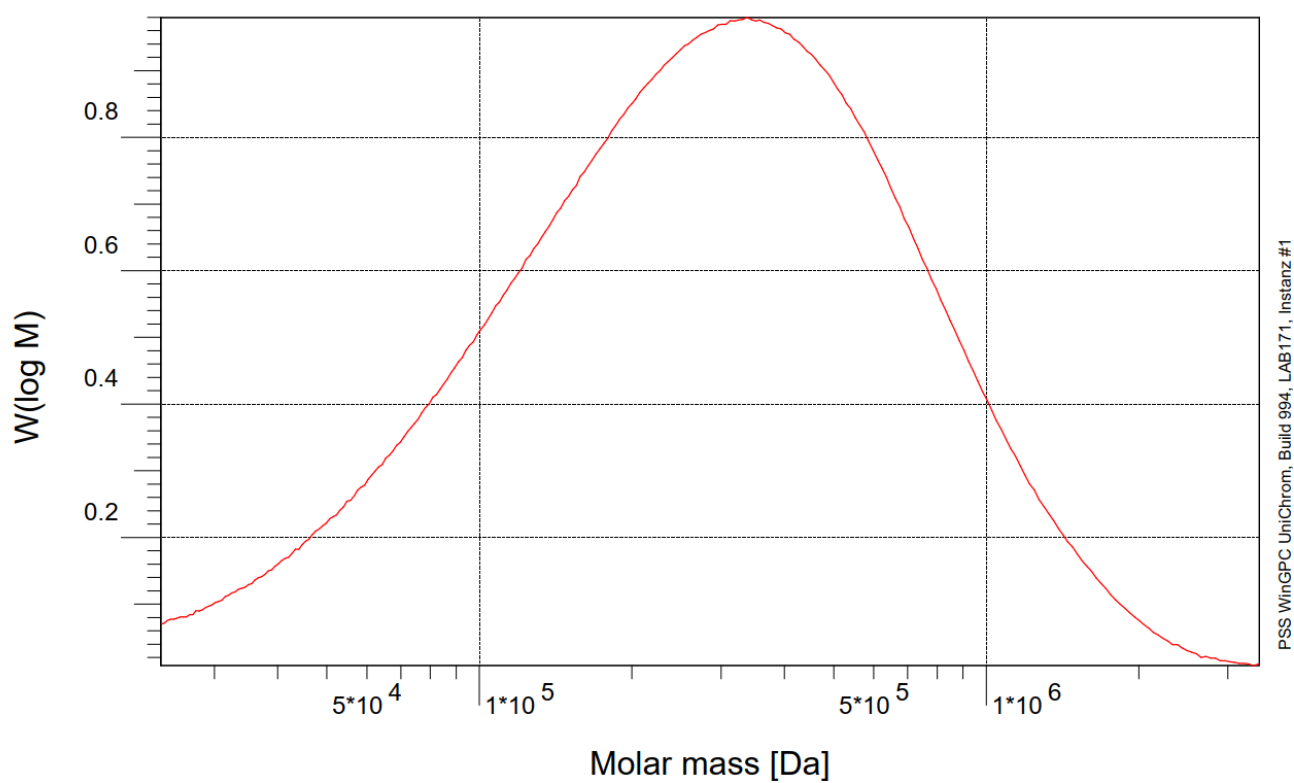

600:1

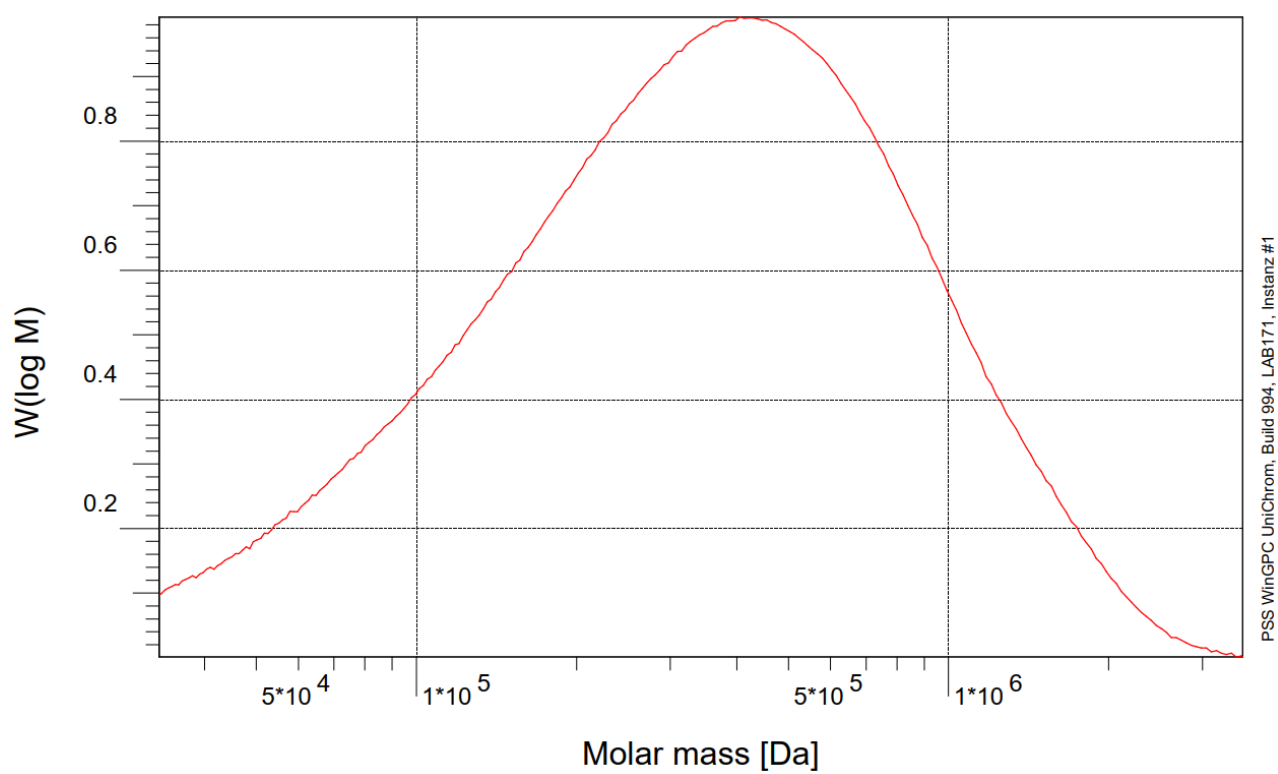

## 9. Spectral data

### $^1\text{H}$ -NMR of the angelica lactone product mixture

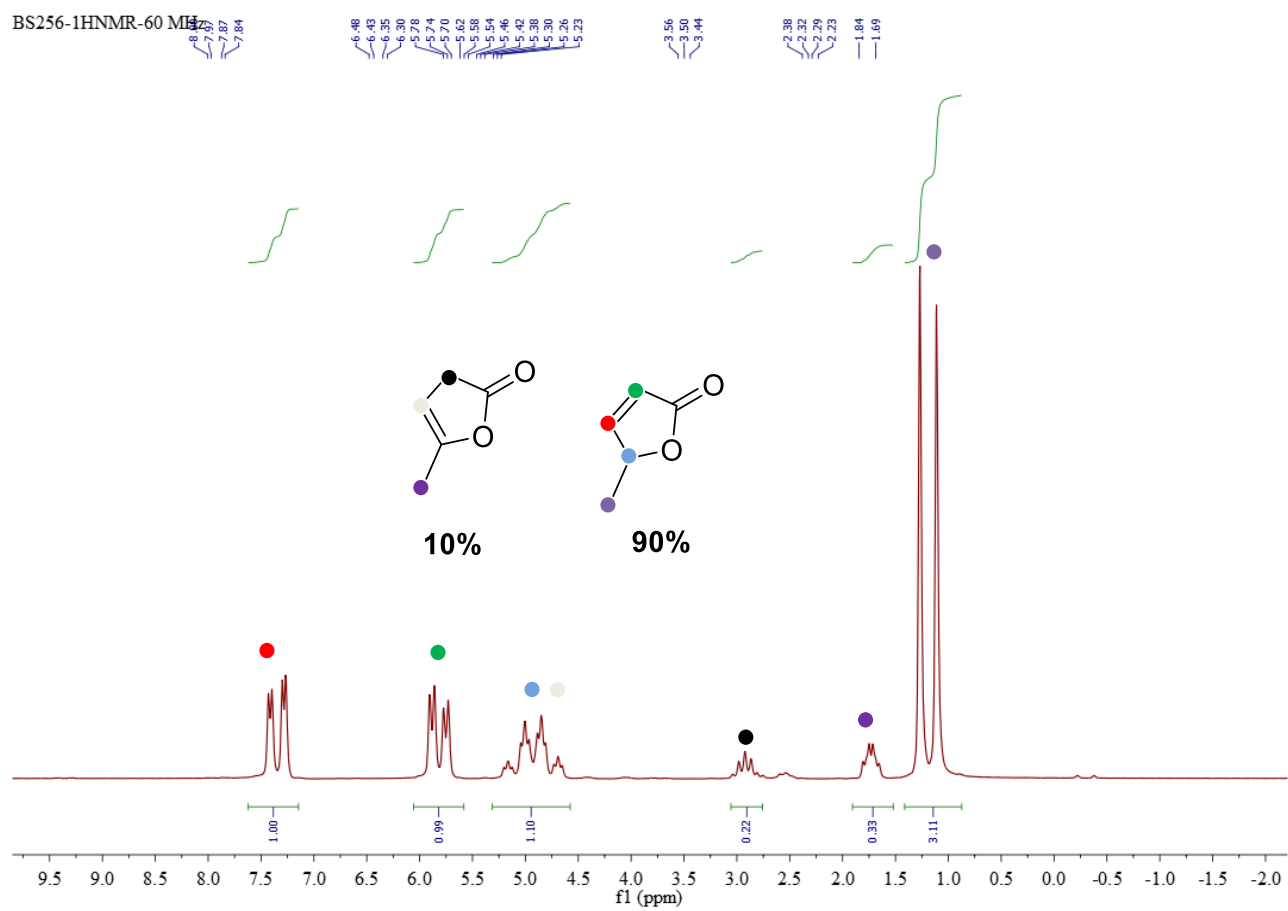

# endo-Cp/ $\beta$ AL

181005.333.10.fid

Andrea Dell'Acqua ADE070 F2

Au1H CD2Cl2 {C:\Bruker\TopSpin3.5pl6} 1810 33

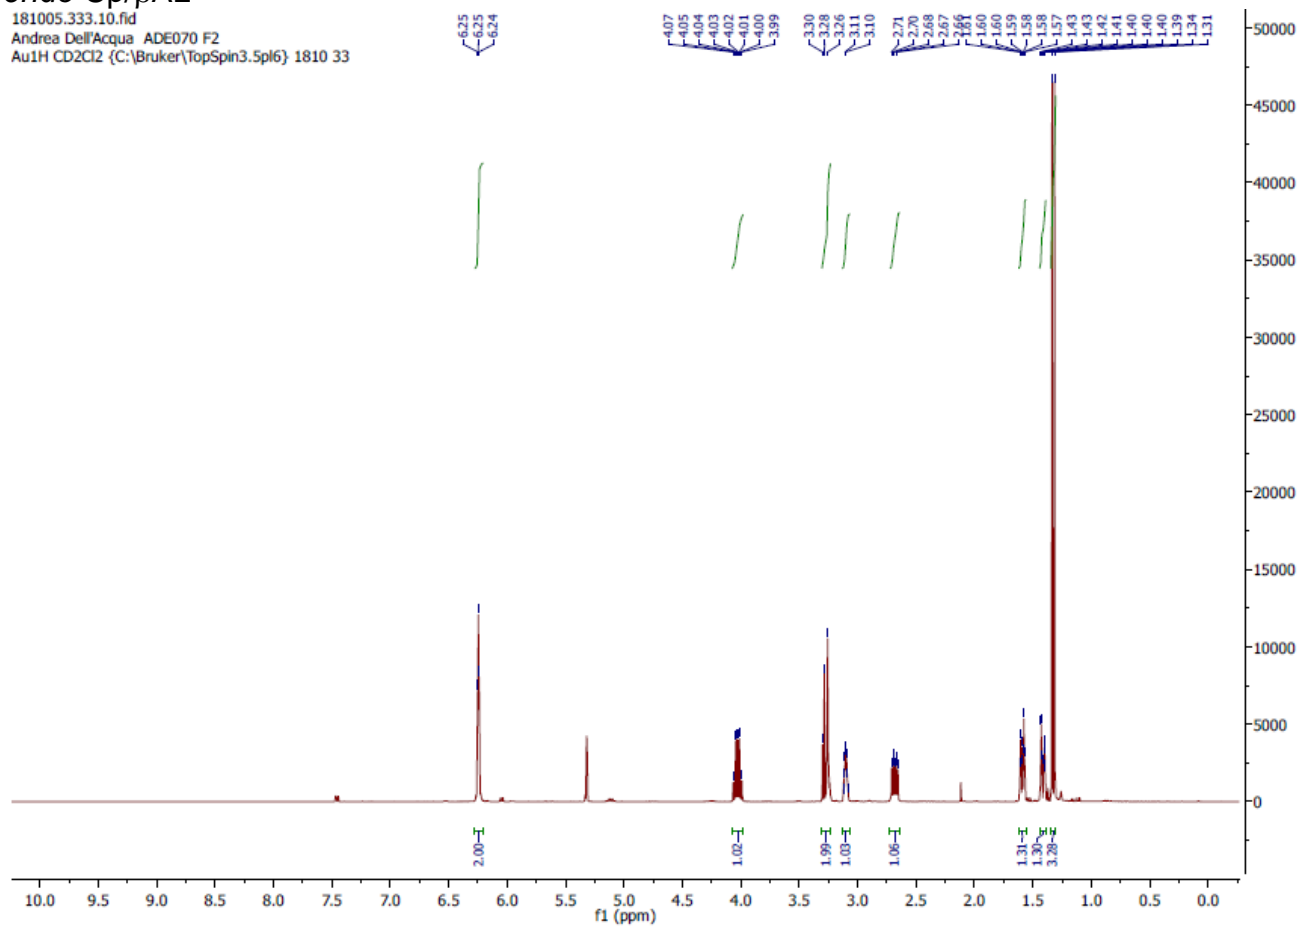

181005.333.11.fid

Andrea Dell'Acqua ADE070 F2

Au13C CD2Cl2 {C:\Bruker\TopSpin3.5pl6} 1810 33

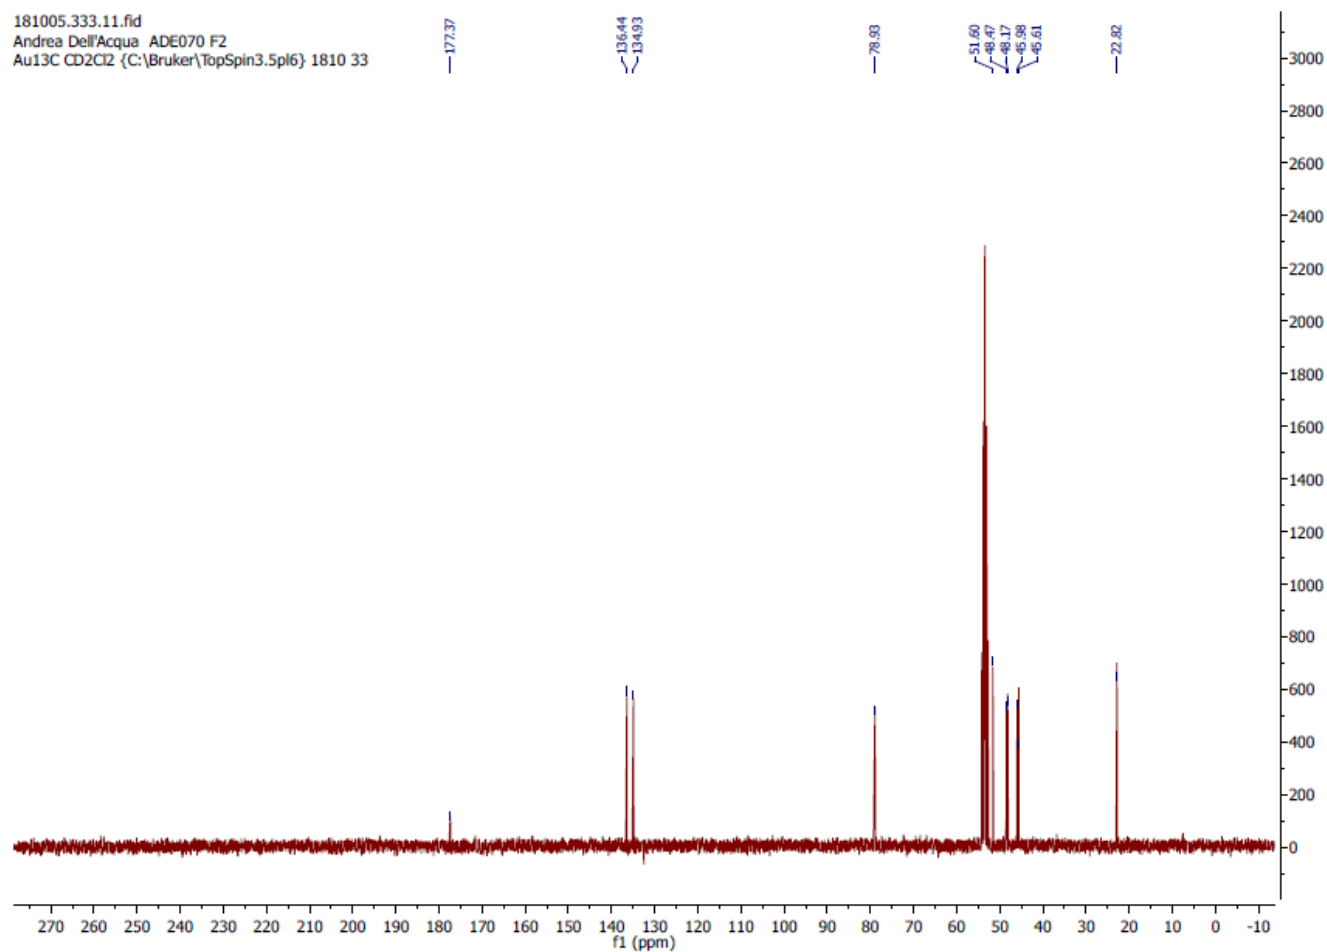



# exo-Cp/ $\beta$ AL

181005.334.10.fid  
Andrea Dell'Acqua ADE070 F1  
Au1H CD2Cl2 {C:\Bruker\TopSpin3.5pl6} 1810 34

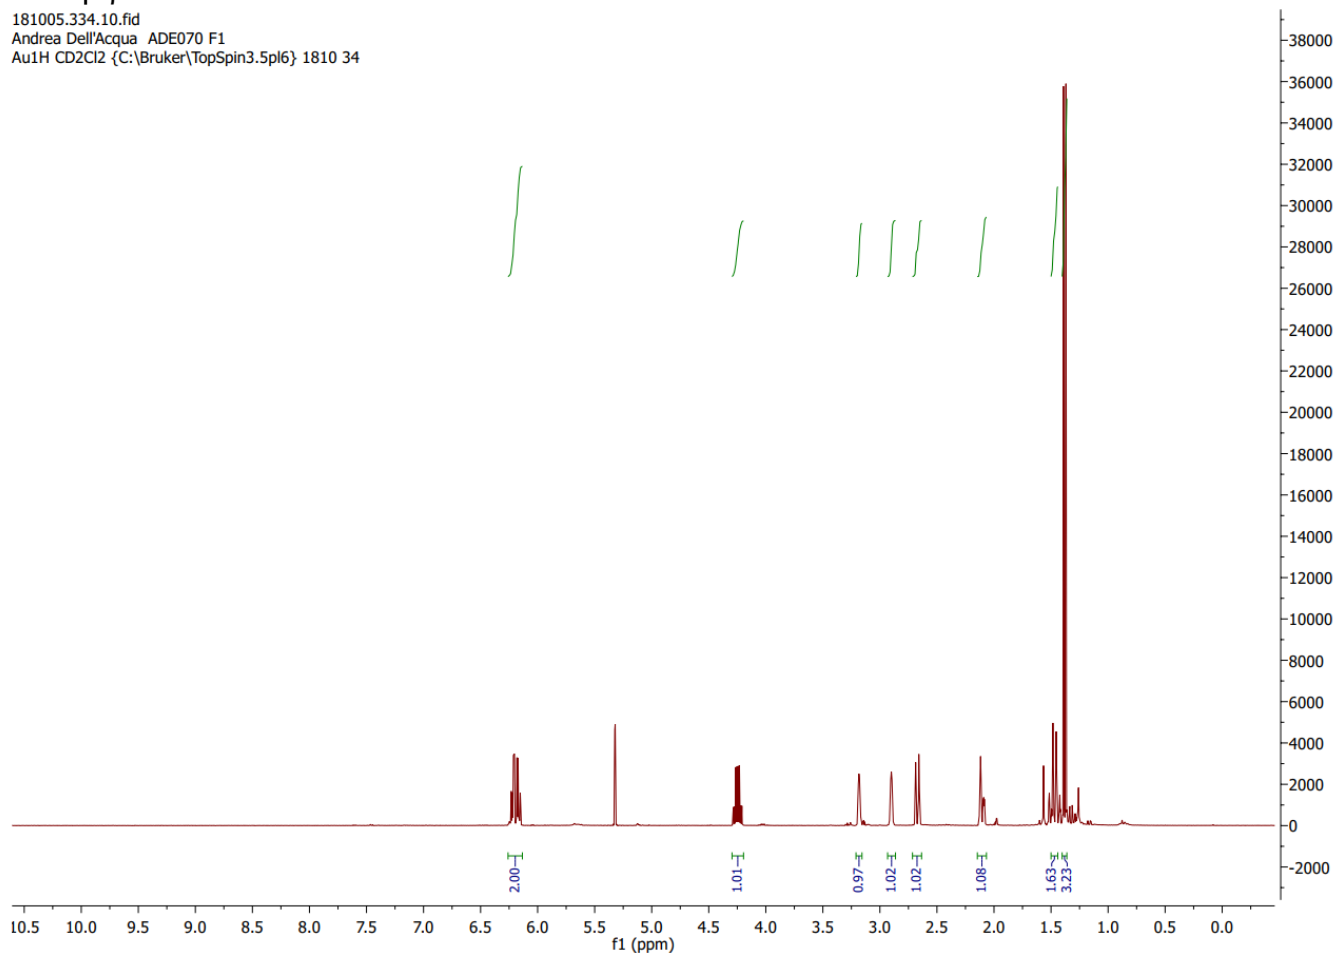

200127.f309.10.fid  
Andrea Dell'Acqua ADE070F1  
C13CPD CDCl3 {C:\Bruker\TopSpin3.6.0} 2001 9

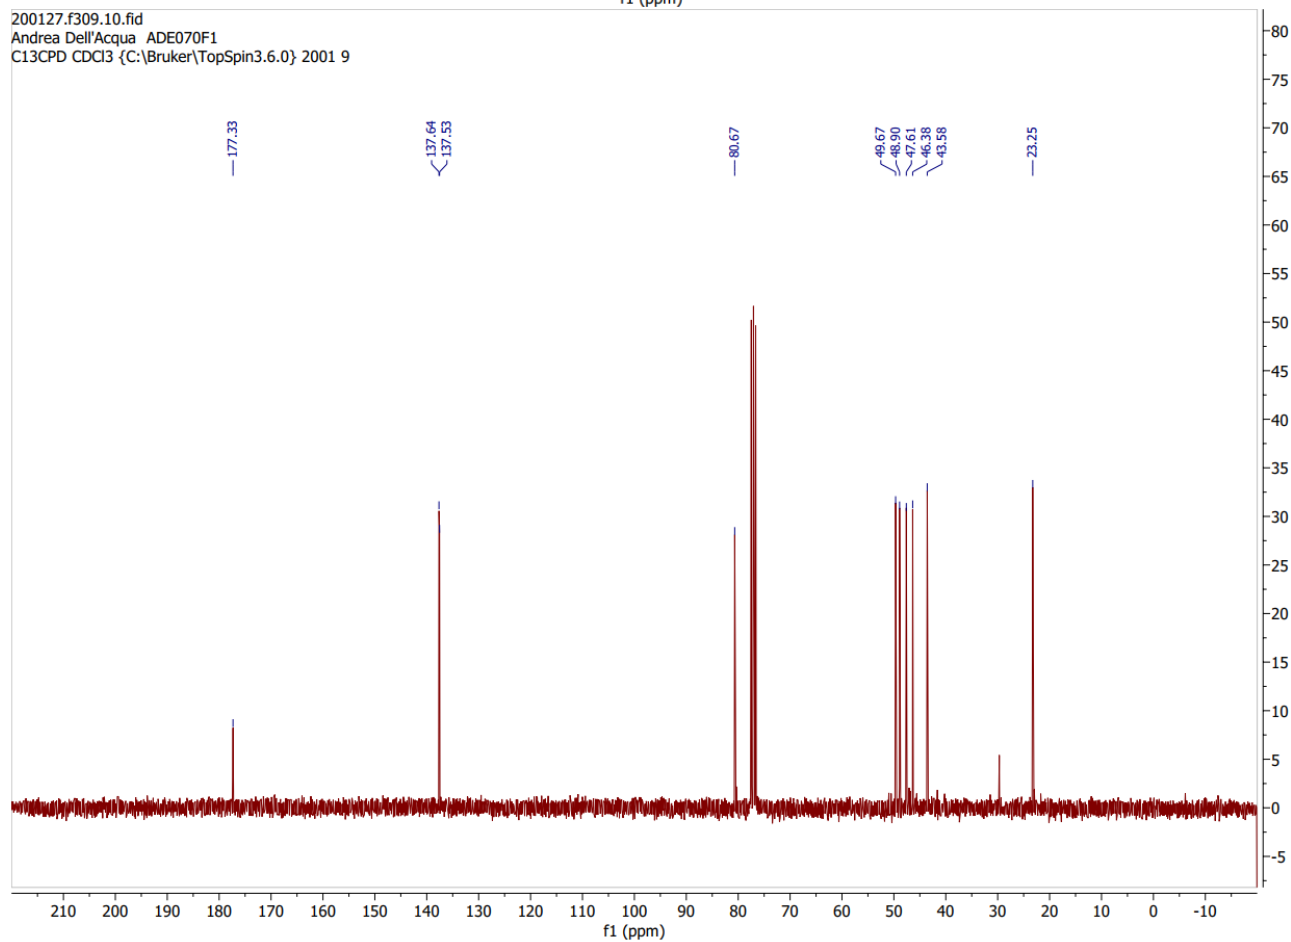

## Isoprene/ $\beta$ AL

Due to the co-presence of different regio- and stereoisomers, NMR data for the other DA adducts are not easily intelligible. NMR was used mainly to confirm the absence of the  $\beta$ AL (C=C signal), while ESI to confirm the product structure.

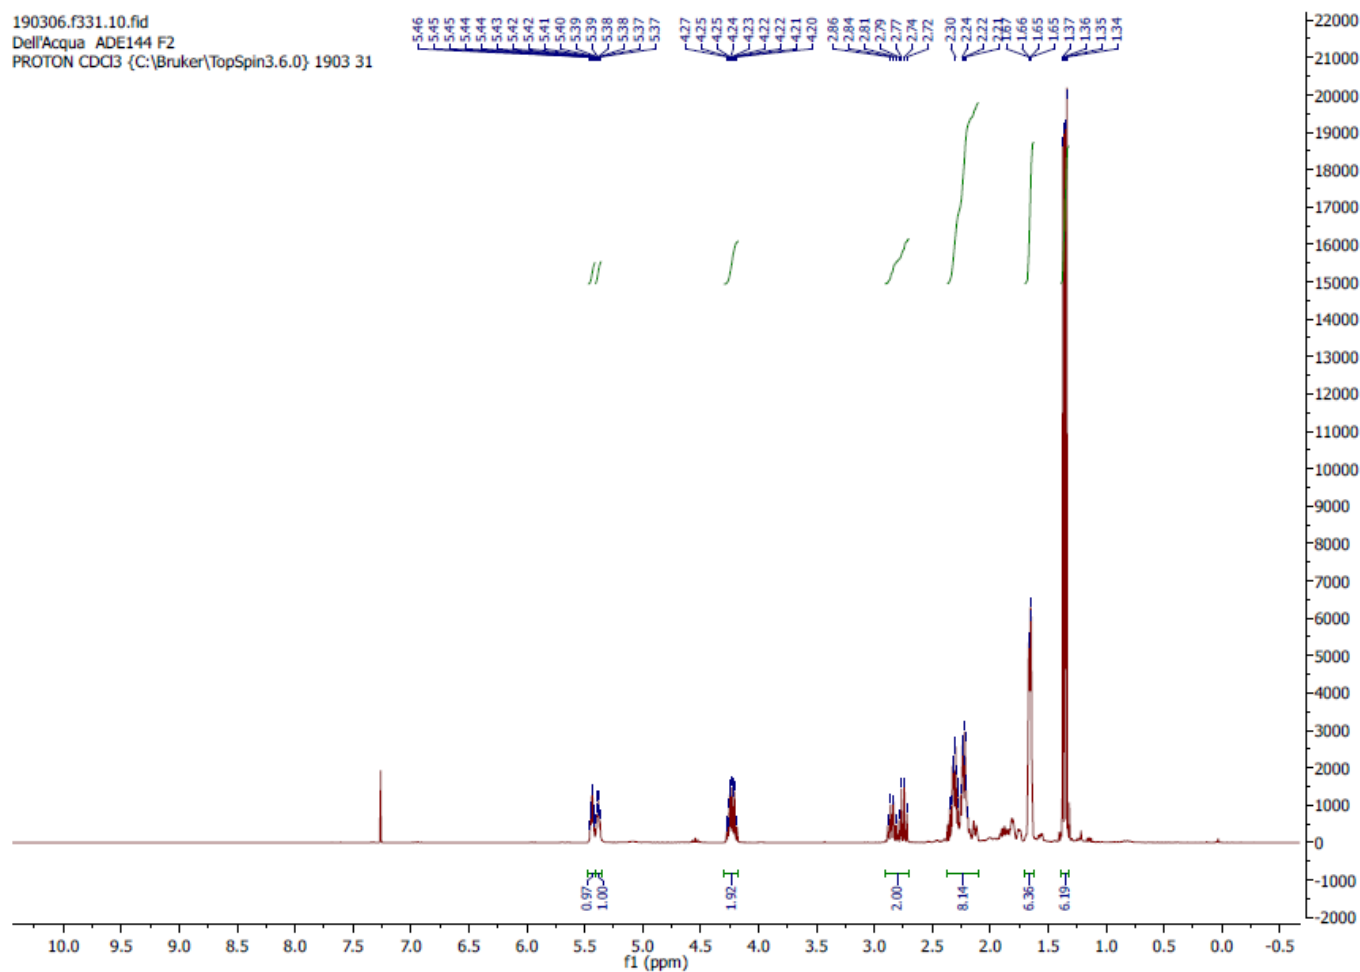

190306.f331.11.fid  
 Dell'Acqua ADE144 F2  
 C13CPD CDCl3 {C:\Bruker\TopSpin3.6.0} 1903 31

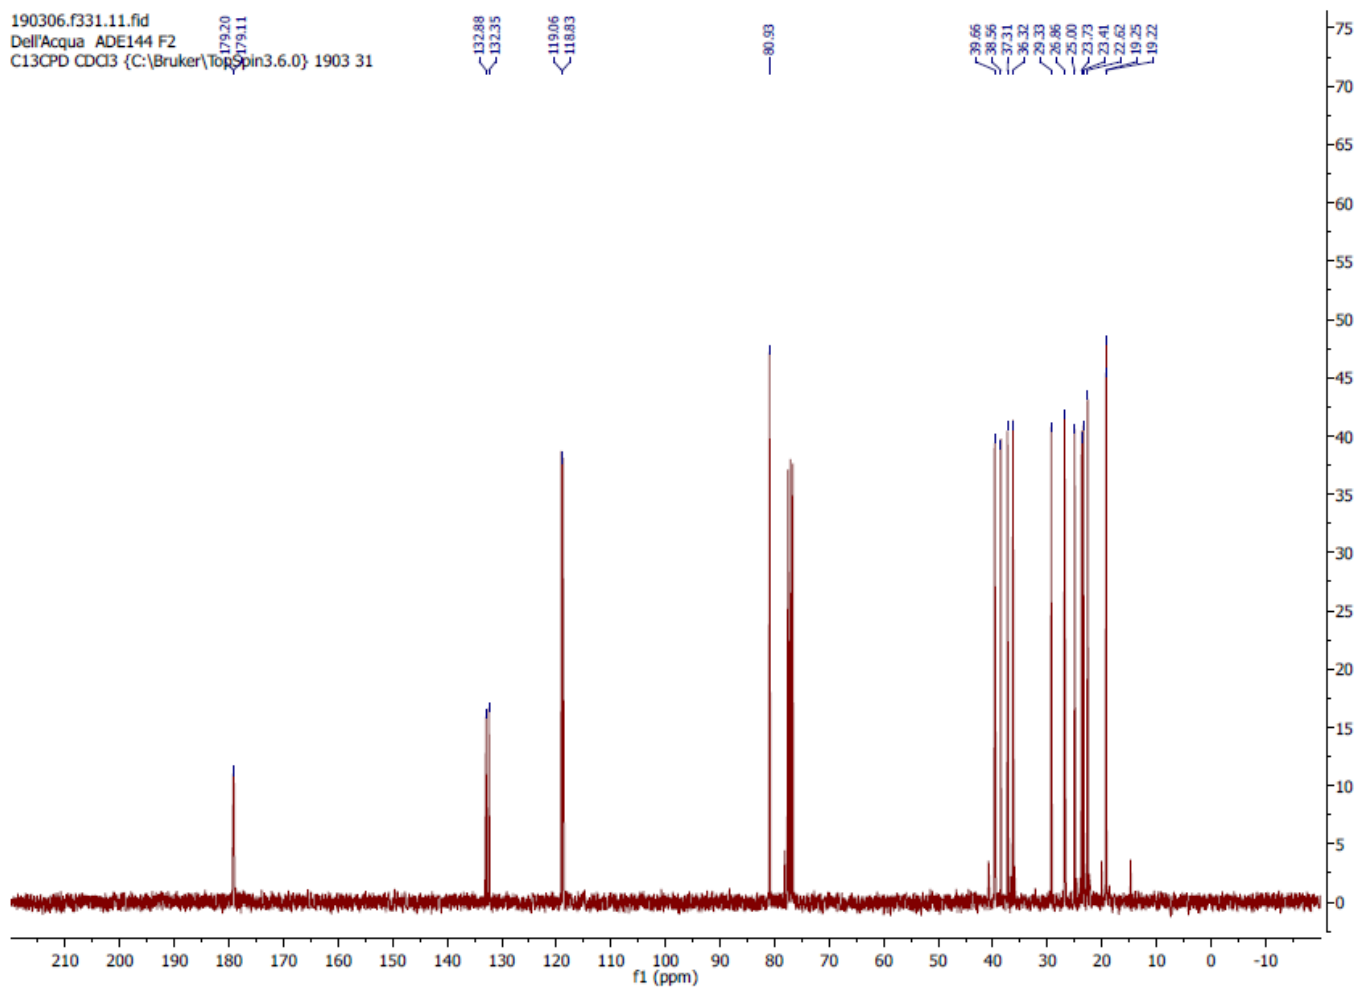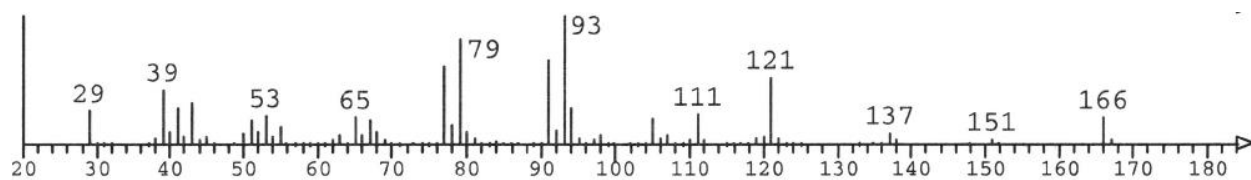

# Myrcene/ $\beta$ AL

190311.413.10.fid  
Dell'Acqua ADE145-4 F2  
Au1H CDCl3 {C:\Bruker\TopSpin3.5pl6} 1903 13

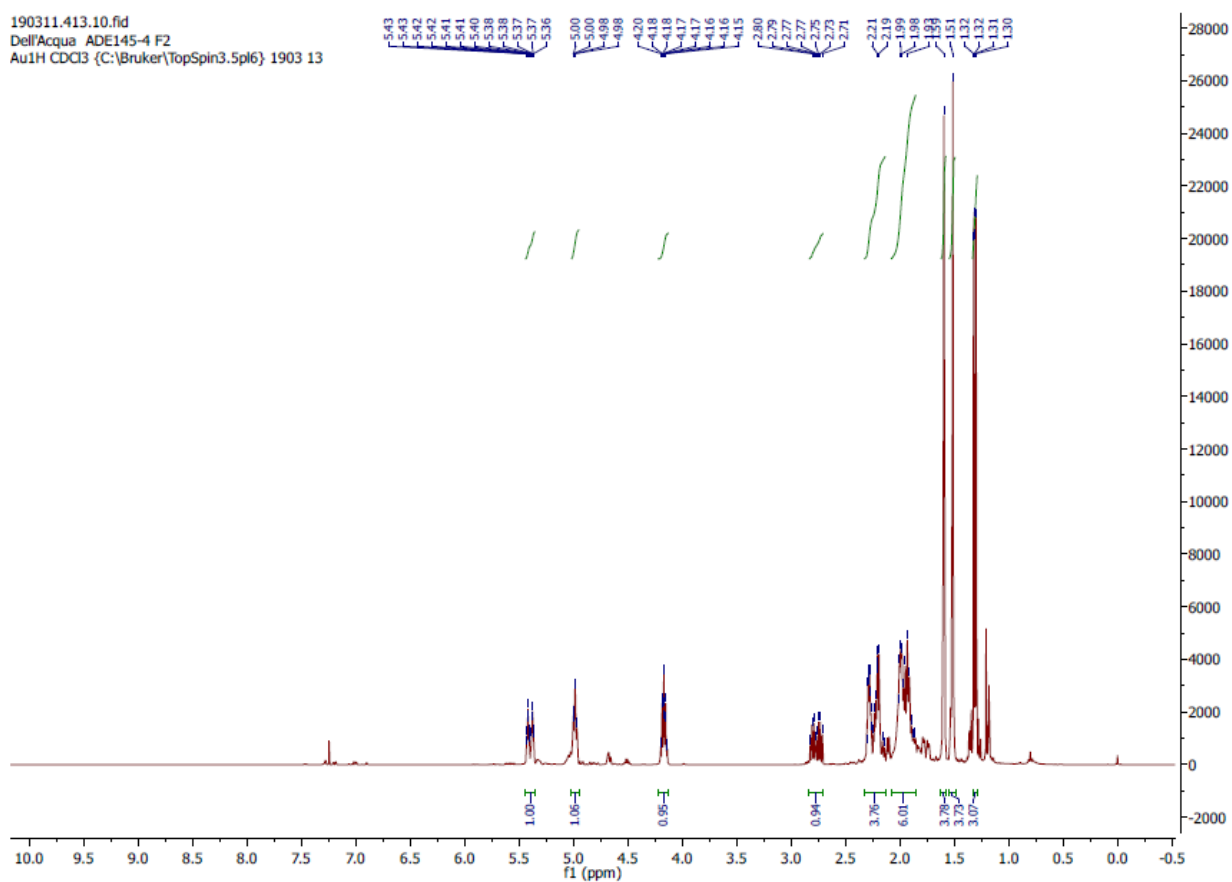

190311.413.11.fid  
Dell'Acqua ADE145-4 F2  
Au13C CDCl3 {C:\Bruker\TopSpin3.5pl6} 1903 13

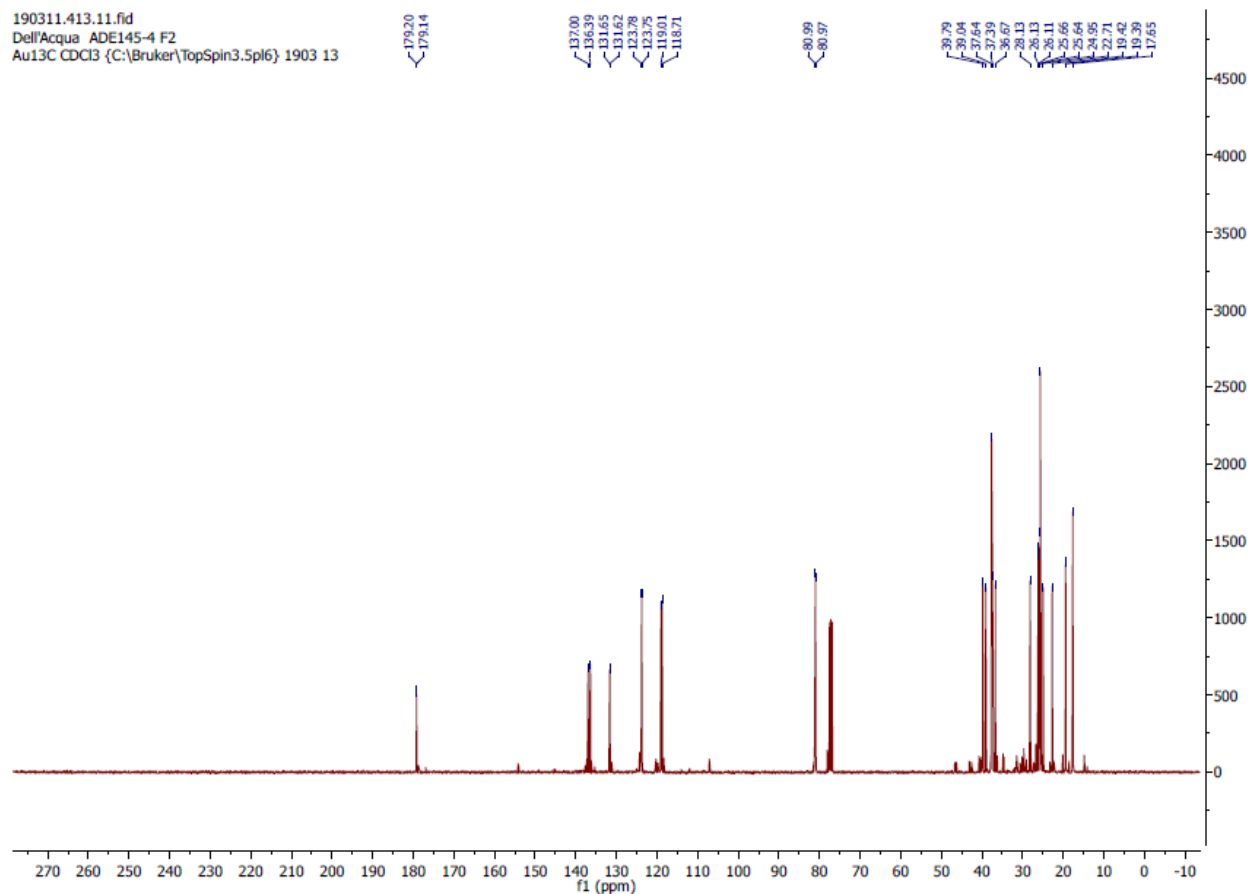

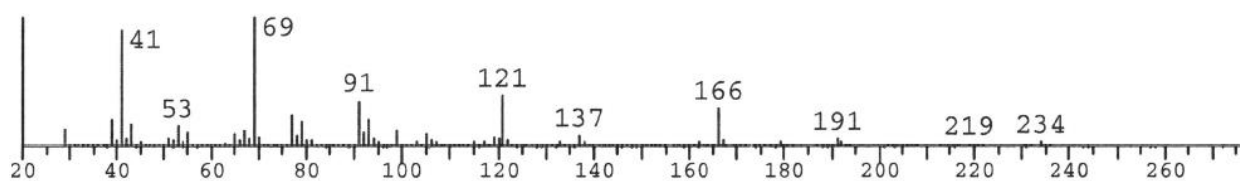

# - Farnesene/βAL

191021.f305.10.fid

Andrea Dell'Acqua ADE-FARN

PROTON CDCl3 {C:\Bruker\TopSpin3.6.0} 1910 5

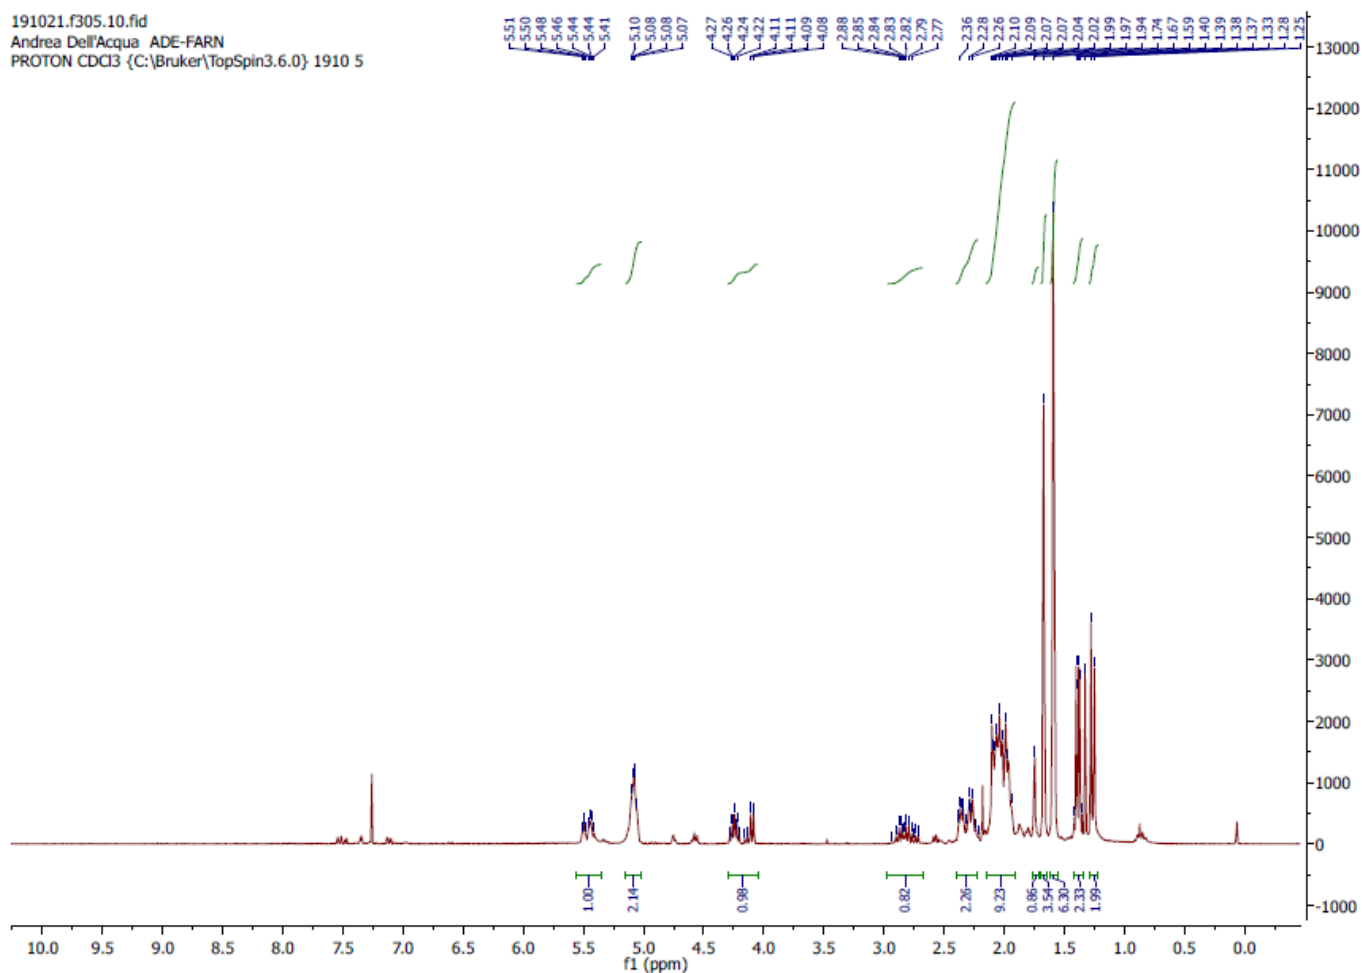

190311.414.11.fid  
 Dell'Acqua ADE145-3 F3  
 Au13C CDCl3 {C:\Bruker\TopSpin3.5pl6} 1903 14

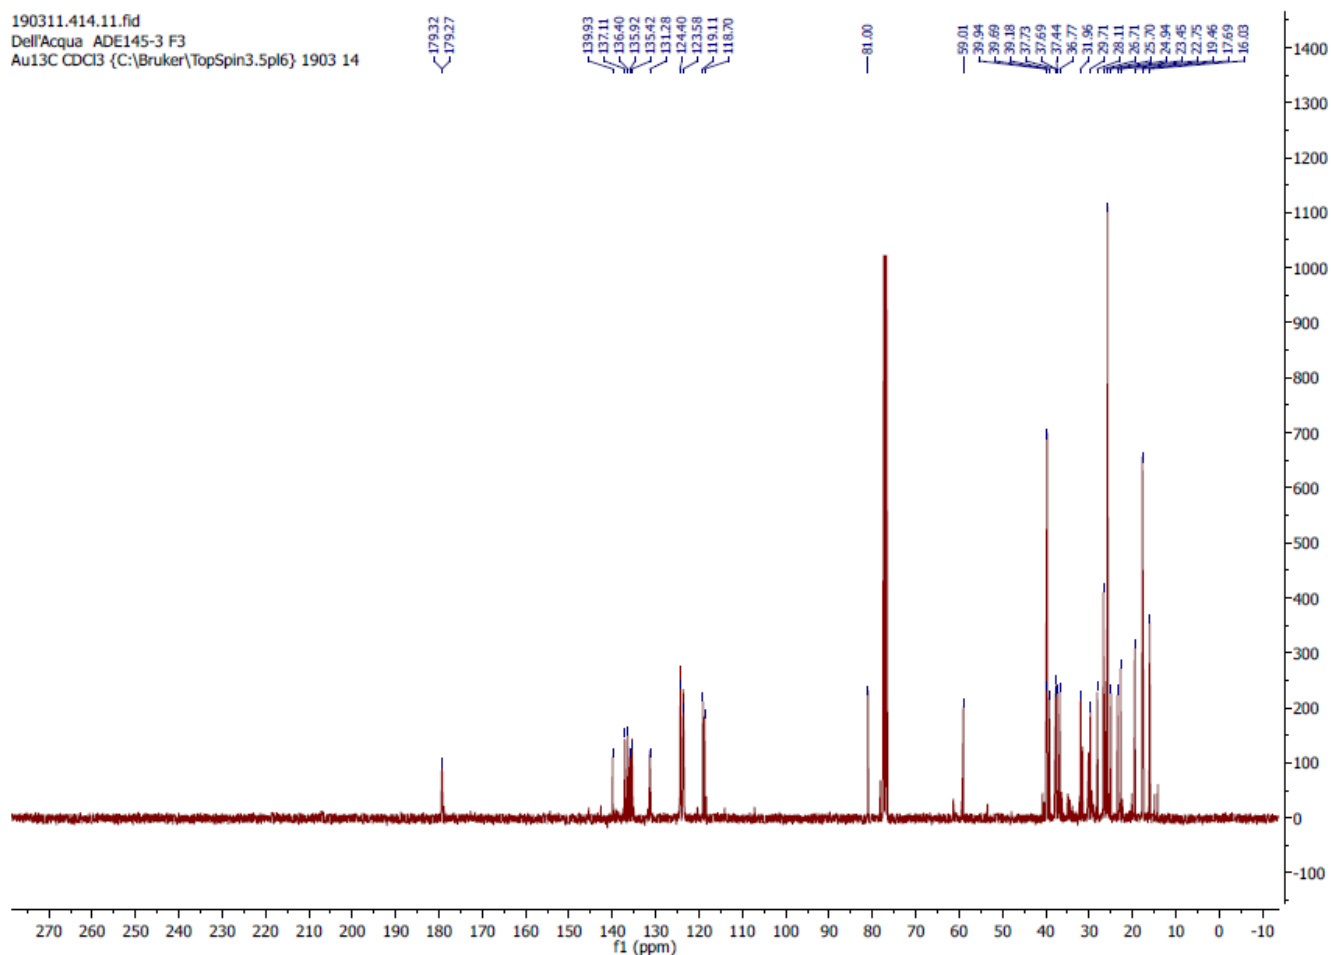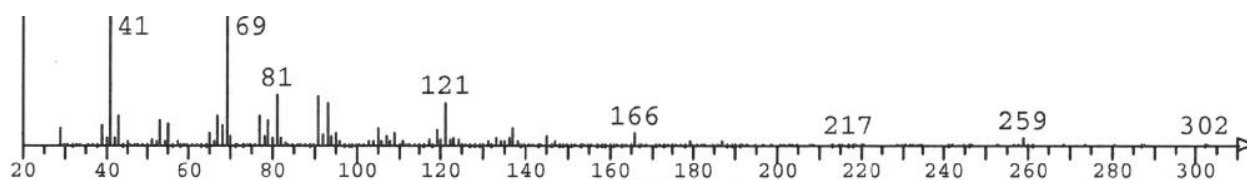

- *poly*-Cp/ $\beta$ AL

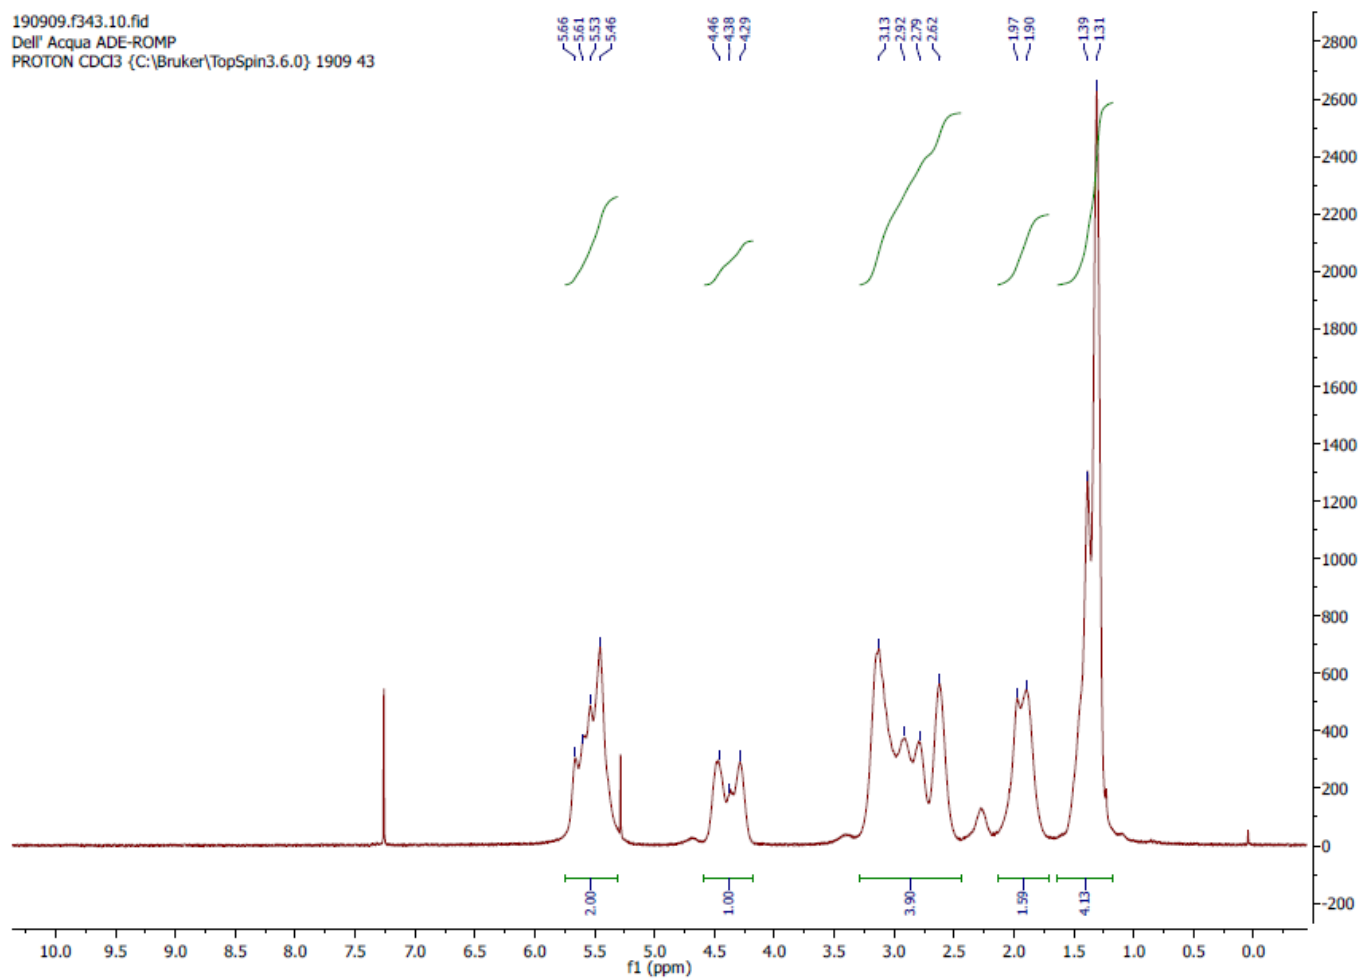

## 10. TGA/DSC analysis

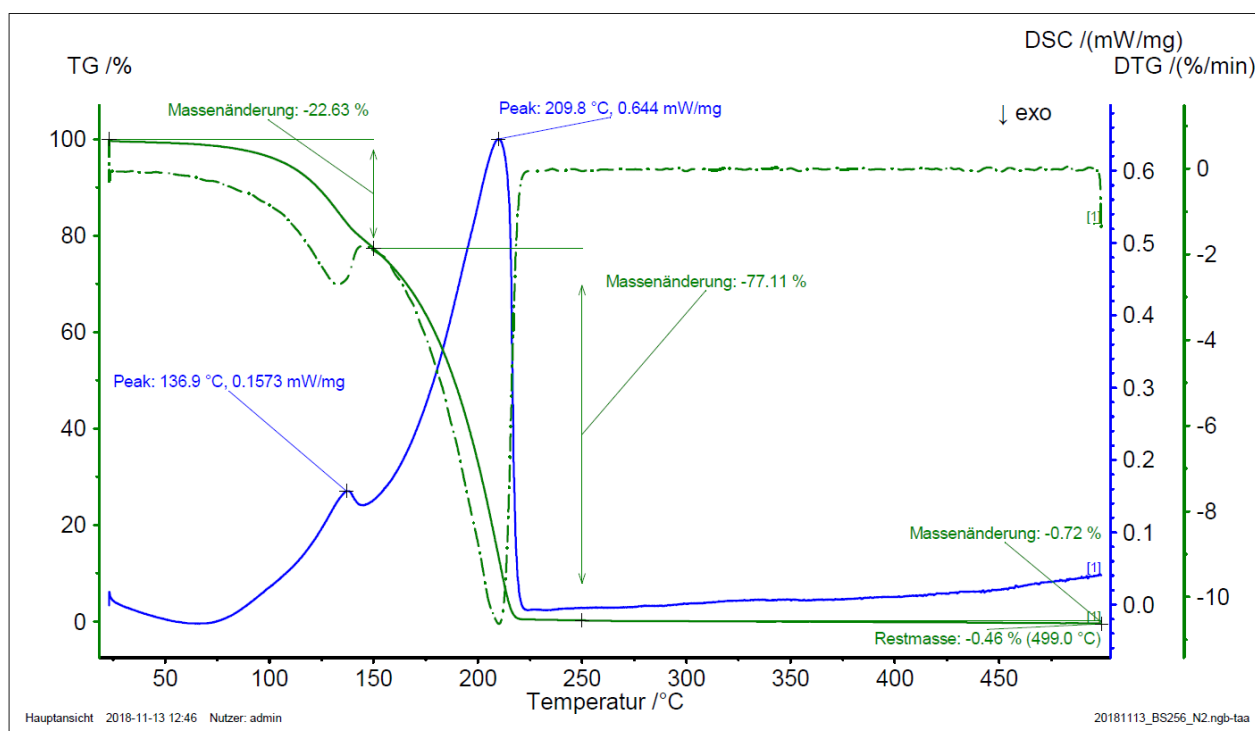

Figure S7 DSC-TG of the Cp/βAL Diels-Alder adduct.

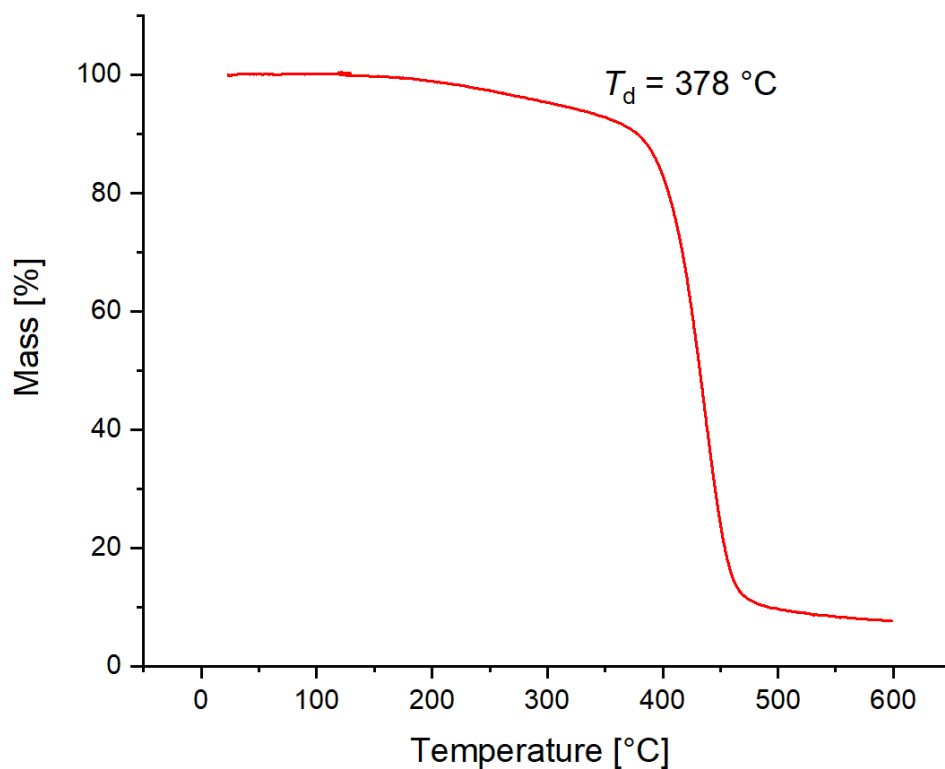

Figure S8 TGA of *poly*-Cp/βAL. The onset of decomposition ( $T_d$ ) was taken at 10% of mass loss.



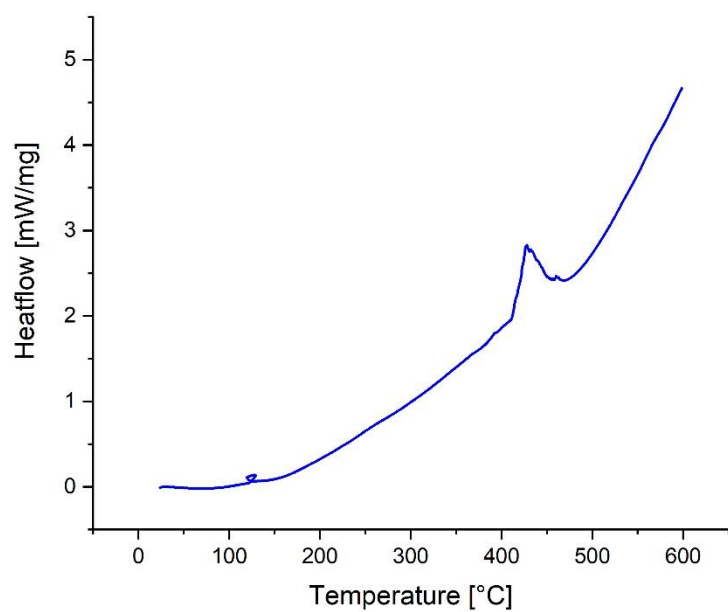

**Figure S9** Corresponding DSC trace to Figure S8
